# Supplementary material for: The Tandem of Liquid Chromatography and Network Pharmacology for the Chemical Profiling of Pule’an Tablets and the Prediction of Mechanism of Action in Treating Prostatitis
Source: Pharmaceuticals (Basel). 2023 Dec 28;17(1):56. doi: 10.3390/ph17010056 (PMC10821205; doi:10.3390/ph17010056)
Supplement: Supplementary file 1 [file pharmaceuticals-17-00056-s001.zip › Supplementary material S2.xlsx]

## Sheet: Sheet1
Supplementary material S2. The identified compounds of PuLe’An Tablets and corresponding targets.
ID	Ingredients	Target	Common name	Uniprot ID
F1	3,7-Di-O-glucosylkaempferol	Ribosomal protein S6 kinase alpha 3	RPS6KA3	P51812
F1	3,7-Di-O-glucosylkaempferol	Carbonic anhydrase II	CA2	P00918
F1	3,7-Di-O-glucosylkaempferol	Carbonic anhydrase IV	CA4	P22748
F1	3,7-Di-O-glucosylkaempferol	Quinone reductase 2	NQO2	P16083
F1	3,7-Di-O-glucosylkaempferol	NADPH oxidase 4	NOX4	Q9NPH5
F1	3,7-Di-O-glucosylkaempferol	Acetylcholinesterase	ACHE	P22303
F1	3,7-Di-O-glucosylkaempferol	Aldose reductase	AKR1B1	P15121
F1	3,7-Di-O-glucosylkaempferol	Carbonic anhydrase VII	CA7	P43166
F1	3,7-Di-O-glucosylkaempferol	Carbonic anhydrase XII	CA12	O43570
F1	3,7-Di-O-glucosylkaempferol	Adrenergic receptor alpha-2	ADRA2C	P18825
F1	3,7-Di-O-glucosylkaempferol	Neuromedin-U receptor 2	NMUR2	Q9GZQ4
F1	3,7-Di-O-glucosylkaempferol	Alpha-2a adrenergic receptor	ADRA2A	P08913
F1	3,7-Di-O-glucosylkaempferol	Phosphodiesterase 5A	PDE5A	O76074
F1	3,7-Di-O-glucosylkaempferol	Lymphocyte differentiation antigen CD38	CD38	P28907
F1	3,7-Di-O-glucosylkaempferol	Cyclooxygenase-2	PTGS2	P35354
F1	3,7-Di-O-glucosylkaempferol	Xanthine dehydrogenase	XDH	P47989
F1	3,7-Di-O-glucosylkaempferol	TNF-alpha	TNF	P01375
F1	3,7-Di-O-glucosylkaempferol	Interleukin-2	IL2	P60568
F1	3,7-Di-O-glucosylkaempferol	Adenosine A1 receptor (by homology)	ADORA1	P30542
F1	3,7-Di-O-glucosylkaempferol	Arachidonate 5-lipoxygenase	ALOX5	P09917
F1	3,7-Di-O-glucosylkaempferol	Adenosine A3 receptor	ADORA3	P0DMS8
F1	3,7-Di-O-glucosylkaempferol	Telomerase reverse transcriptase	TERT	O14746
F10	isorhamnetin 3-O-sophoroside	Neuromedin-U receptor 2	NMUR2	Q9GZQ4
F10	isorhamnetin 3-O-sophoroside	Alpha-2a adrenergic receptor	ADRA2A	P08913
F10	isorhamnetin 3-O-sophoroside	Adrenergic receptor alpha-2	ADRA2C	P18825
F10	isorhamnetin 3-O-sophoroside	Acetylcholinesterase	ACHE	P22303
F10	isorhamnetin 3-O-sophoroside	NADPH oxidase 4	NOX4	Q9NPH5
F10	isorhamnetin 3-O-sophoroside	Carbonic anhydrase II	CA2	P00918
F10	isorhamnetin 3-O-sophoroside	Ribosomal protein S6 kinase alpha 3	RPS6KA3	P51812
F10	isorhamnetin 3-O-sophoroside	Quinone reductase 2	NQO2	P16083
F10	isorhamnetin 3-O-sophoroside	Aldose reductase	AKR1B1	P15121
F10	isorhamnetin 3-O-sophoroside	Cyclooxygenase-2	PTGS2	P35354
F10	isorhamnetin 3-O-sophoroside	Carbonic anhydrase VII	CA7	P43166
F10	isorhamnetin 3-O-sophoroside	Carbonic anhydrase XII	CA12	O43570
F10	isorhamnetin 3-O-sophoroside	Carbonic anhydrase IV	CA4	P22748
F10	isorhamnetin 3-O-sophoroside	Xanthine dehydrogenase	XDH	P47989
F10	isorhamnetin 3-O-sophoroside	Lymphocyte differentiation antigen CD38	CD38	P28907
F10	isorhamnetin 3-O-sophoroside	Phosphodiesterase 5A	PDE5A	O76074
F10	isorhamnetin 3-O-sophoroside	TNF-alpha	TNF	P01375
F10	isorhamnetin 3-O-sophoroside	Interleukin-2	IL2	P60568
F10	isorhamnetin 3-O-sophoroside	Adenosine A1 receptor (by homology)	ADORA1	P30542
F10	isorhamnetin 3-O-sophoroside	Arachidonate 5-lipoxygenase	ALOX5	P09917
F10	isorhamnetin 3-O-sophoroside	Telomerase reverse transcriptase	TERT	O14746
F11	quercetin 3-O-β-D-glucopyranosyl-(2->1)-O-β-D-xylopyranoside	Neuromedin-U receptor 2	NMUR2	Q9GZQ4
F11	quercetin 3-O-β-D-glucopyranosyl-(2->1)-O-β-D-xylopyranoside	Alpha-2a adrenergic receptor	ADRA2A	P08913
F11	quercetin 3-O-β-D-glucopyranosyl-(2->1)-O-β-D-xylopyranoside	Adrenergic receptor alpha-2	ADRA2C	P18825
F11	quercetin 3-O-β-D-glucopyranosyl-(2->1)-O-β-D-xylopyranoside	Acetylcholinesterase	ACHE	P22303
F11	quercetin 3-O-β-D-glucopyranosyl-(2->1)-O-β-D-xylopyranoside	Aldose reductase	AKR1B1	P15121
F11	quercetin 3-O-β-D-glucopyranosyl-(2->1)-O-β-D-xylopyranoside	NADPH oxidase 4	NOX4	Q9NPH5
F11	quercetin 3-O-β-D-glucopyranosyl-(2->1)-O-β-D-xylopyranoside	Carbonic anhydrase II	CA2	P00918
F11	quercetin 3-O-β-D-glucopyranosyl-(2->1)-O-β-D-xylopyranoside	Carbonic anhydrase VII	CA7	P43166
F11	quercetin 3-O-β-D-glucopyranosyl-(2->1)-O-β-D-xylopyranoside	Carbonic anhydrase XII	CA12	O43570
F11	quercetin 3-O-β-D-glucopyranosyl-(2->1)-O-β-D-xylopyranoside	Carbonic anhydrase IV	CA4	P22748
F11	quercetin 3-O-β-D-glucopyranosyl-(2->1)-O-β-D-xylopyranoside	Xanthine dehydrogenase	XDH	P47989
F11	quercetin 3-O-β-D-glucopyranosyl-(2->1)-O-β-D-xylopyranoside	Ribosomal protein S6 kinase alpha 3	RPS6KA3	P51812
F11	quercetin 3-O-β-D-glucopyranosyl-(2->1)-O-β-D-xylopyranoside	Lymphocyte differentiation antigen CD38	CD38	P28907
F11	quercetin 3-O-β-D-glucopyranosyl-(2->1)-O-β-D-xylopyranoside	Quinone reductase 2	NQO2	P16083
F11	quercetin 3-O-β-D-glucopyranosyl-(2->1)-O-β-D-xylopyranoside	Cyclooxygenase-2	PTGS2	P35354
F11	quercetin 3-O-β-D-glucopyranosyl-(2->1)-O-β-D-xylopyranoside	Phosphodiesterase 5A	PDE5A	O76074
F11	quercetin 3-O-β-D-glucopyranosyl-(2->1)-O-β-D-xylopyranoside	TNF-alpha	TNF	P01375
F11	quercetin 3-O-β-D-glucopyranosyl-(2->1)-O-β-D-xylopyranoside	Interleukin-2	IL2	P60568
F11	quercetin 3-O-β-D-glucopyranosyl-(2->1)-O-β-D-xylopyranoside	Adenosine A1 receptor (by homology)	ADORA1	P30542
F11	quercetin 3-O-β-D-glucopyranosyl-(2->1)-O-β-D-xylopyranoside	Arachidonate 5-lipoxygenase	ALOX5	P09917
F11	quercetin 3-O-β-D-glucopyranosyl-(2->1)-O-β-D-xylopyranoside	Telomerase reverse transcriptase	TERT	O14746
F12	kaempferol 3-O-(6’’-O-malonyl)glucoside	Aldose reductase (by homology)	AKR1B1	P15121
F12	kaempferol 3-O-(6’’-O-malonyl)glucoside	Adrenergic receptor alpha-2	ADRA2C	P18825
F12	kaempferol 3-O-(6’’-O-malonyl)glucoside	Acetylcholinesterase	ACHE	P22303
F12	kaempferol 3-O-(6’’-O-malonyl)glucoside	Ribosomal protein S6 kinase alpha 3	RPS6KA3	P51812
F12	kaempferol 3-O-(6’’-O-malonyl)glucoside	NADPH oxidase 4	NOX4	Q9NPH5
F12	kaempferol 3-O-(6’’-O-malonyl)glucoside	Carbonic anhydrase II	CA2	P00918
F12	kaempferol 3-O-(6’’-O-malonyl)glucoside	Carbonic anhydrase VII	CA7	P43166
F12	kaempferol 3-O-(6’’-O-malonyl)glucoside	Carbonic anhydrase XII	CA12	O43570
F12	kaempferol 3-O-(6’’-O-malonyl)glucoside	Carbonic anhydrase IV	CA4	P22748
F12	kaempferol 3-O-(6’’-O-malonyl)glucoside	Cyclooxygenase-2	PTGS2	P35354
F12	kaempferol 3-O-(6’’-O-malonyl)glucoside	Quinone reductase 2	NQO2	P16083
F12	kaempferol 3-O-(6’’-O-malonyl)glucoside	Neuromedin-U receptor 2	NMUR2	Q9GZQ4
F12	kaempferol 3-O-(6’’-O-malonyl)glucoside	Alpha-2a adrenergic receptor	ADRA2A	P08913
F12	kaempferol 3-O-(6’’-O-malonyl)glucoside	Phosphodiesterase 5A	PDE5A	O76074
F12	kaempferol 3-O-(6’’-O-malonyl)glucoside	Lymphocyte differentiation antigen CD38	CD38	P28907
F12	kaempferol 3-O-(6’’-O-malonyl)glucoside	Xanthine dehydrogenase	XDH	P47989
F12	kaempferol 3-O-(6’’-O-malonyl)glucoside	Adenosine A1 receptor (by homology)	ADORA1	P30542
F12	kaempferol 3-O-(6’’-O-malonyl)glucoside	TNF-alpha	TNF	P01375
F12	kaempferol 3-O-(6’’-O-malonyl)glucoside	Interleukin-2	IL2	P60568
F12	kaempferol 3-O-(6’’-O-malonyl)glucoside	Arachidonate 5-lipoxygenase	ALOX5	P09917
F12	kaempferol 3-O-(6’’-O-malonyl)glucoside	Equilibrative nucleoside transporter 1	SLC29A1	Q99808
F12	kaempferol 3-O-(6’’-O-malonyl)glucoside	Thrombin and coagulation factor X	F10	P00742
F13	isorhamnetin-3-O-rhamnoside	Aldose reductase	AKR1B1	P15121
F13	isorhamnetin-3-O-rhamnoside	Carbonic anhydrase II	CA2	P00918
F13	isorhamnetin-3-O-rhamnoside	Carbonic anhydrase VII	CA7	P43166
F13	isorhamnetin-3-O-rhamnoside	Carbonic anhydrase XII	CA12	O43570
F13	isorhamnetin-3-O-rhamnoside	Carbonic anhydrase IV	CA4	P22748
F13	isorhamnetin-3-O-rhamnoside	Ribosomal protein S6 kinase alpha 3	RPS6KA3	P51812
F13	isorhamnetin-3-O-rhamnoside	Quinone reductase 2	NQO2	P16083
F13	isorhamnetin-3-O-rhamnoside	NADPH oxidase 4	NOX4	Q9NPH5
F13	isorhamnetin-3-O-rhamnoside	Adrenergic receptor alpha-2	ADRA2C	P18825
F13	isorhamnetin-3-O-rhamnoside	Acetylcholinesterase	ACHE	P22303
F13	isorhamnetin-3-O-rhamnoside	Neuromedin-U receptor 2	NMUR2	Q9GZQ4
F13	isorhamnetin-3-O-rhamnoside	Alpha-2a adrenergic receptor	ADRA2A	P08913
F13	isorhamnetin-3-O-rhamnoside	Lymphocyte differentiation antigen CD38	CD38	P28907
F13	isorhamnetin-3-O-rhamnoside	Cyclooxygenase-2	PTGS2	P35354
F13	isorhamnetin-3-O-rhamnoside	Xanthine dehydrogenase	XDH	P47989
F13	isorhamnetin-3-O-rhamnoside	Phosphodiesterase 5A	PDE5A	O76074
F13	isorhamnetin-3-O-rhamnoside	Interleukin-2	IL2	P60568
F13	isorhamnetin-3-O-rhamnoside	Adenosine A1 receptor (by homology)	ADORA1	P30542
F13	isorhamnetin-3-O-rhamnoside	Arachidonate 5-lipoxygenase	ALOX5	P09917
F13	isorhamnetin-3-O-rhamnoside	Equilibrative nucleoside transporter 1	SLC29A1	Q99808
F13	isorhamnetin-3-O-rhamnoside	TNF-alpha	TNF	P01375
F14	isorhamnetin-3-O-glucoside	Aldose reductase (by homology)	AKR1B1	P15121
F14	isorhamnetin-3-O-glucoside	Carbonic anhydrase II	CA2	P00918
F14	isorhamnetin-3-O-glucoside	Carbonic anhydrase VII	CA7	P43166
F14	isorhamnetin-3-O-glucoside	Carbonic anhydrase XII	CA12	O43570
F14	isorhamnetin-3-O-glucoside	Carbonic anhydrase IV	CA4	P22748
F14	isorhamnetin-3-O-glucoside	NADPH oxidase 4	NOX4	Q9NPH5
F14	isorhamnetin-3-O-glucoside	Adrenergic receptor alpha-2	ADRA2C	P18825
F14	isorhamnetin-3-O-glucoside	Acetylcholinesterase	ACHE	P22303
F14	isorhamnetin-3-O-glucoside	Quinone reductase 2	NQO2	P16083
F14	isorhamnetin-3-O-glucoside	Ribosomal protein S6 kinase alpha 3	RPS6KA3	P51812
F14	isorhamnetin-3-O-glucoside	Neuromedin-U receptor 2	NMUR2	Q9GZQ4
F14	isorhamnetin-3-O-glucoside	Alpha-2a adrenergic receptor	ADRA2A	P08913
F14	isorhamnetin-3-O-glucoside	Cyclooxygenase-2	PTGS2	P35354
F14	isorhamnetin-3-O-glucoside	Lymphocyte differentiation antigen CD38	CD38	P28907
F14	isorhamnetin-3-O-glucoside	Phosphodiesterase 5A	PDE5A	O76074
F14	isorhamnetin-3-O-glucoside	Xanthine dehydrogenase	XDH	P47989
F14	isorhamnetin-3-O-glucoside	TNF-alpha	TNF	P01375
F14	isorhamnetin-3-O-glucoside	Interleukin-2	IL2	P60568
F14	isorhamnetin-3-O-glucoside	Adenosine A1 receptor (by homology)	ADORA1	P30542
F14	isorhamnetin-3-O-glucoside	Arachidonate 5-lipoxygenase	ALOX5	P09917
F14	isorhamnetin-3-O-glucoside	Telomerase reverse transcriptase	TERT	O14746
F14	isorhamnetin-3-O-glucoside	Equilibrative nucleoside transporter 1	SLC29A1	Q99808
F15	kaempferol 3-O-α-L-arabinopyranosyl-(1'''->6'')-β-D-glucopyranoside	Neuromedin-U receptor 2	NMUR2	Q9GZQ4
F15	kaempferol 3-O-α-L-arabinopyranosyl-(1'''->6'')-β-D-glucopyranoside	Alpha-2a adrenergic receptor	ADRA2A	P08913
F15	kaempferol 3-O-α-L-arabinopyranosyl-(1'''->6'')-β-D-glucopyranoside	Adrenergic receptor alpha-2	ADRA2C	P18825
F15	kaempferol 3-O-α-L-arabinopyranosyl-(1'''->6'')-β-D-glucopyranoside	Acetylcholinesterase	ACHE	P22303
F15	kaempferol 3-O-α-L-arabinopyranosyl-(1'''->6'')-β-D-glucopyranoside	Aldose reductase (by homology)	AKR1B1	P15121
F15	kaempferol 3-O-α-L-arabinopyranosyl-(1'''->6'')-β-D-glucopyranoside	Carbonic anhydrase II	CA2	P00918
F15	kaempferol 3-O-α-L-arabinopyranosyl-(1'''->6'')-β-D-glucopyranoside	Carbonic anhydrase VII	CA7	P43166
F15	kaempferol 3-O-α-L-arabinopyranosyl-(1'''->6'')-β-D-glucopyranoside	Carbonic anhydrase XII	CA12	O43570
F15	kaempferol 3-O-α-L-arabinopyranosyl-(1'''->6'')-β-D-glucopyranoside	Carbonic anhydrase IV	CA4	P22748
F15	kaempferol 3-O-α-L-arabinopyranosyl-(1'''->6'')-β-D-glucopyranoside	NADPH oxidase 4	NOX4	Q9NPH5
F15	kaempferol 3-O-α-L-arabinopyranosyl-(1'''->6'')-β-D-glucopyranoside	Ribosomal protein S6 kinase alpha 3	RPS6KA3	P51812
F15	kaempferol 3-O-α-L-arabinopyranosyl-(1'''->6'')-β-D-glucopyranoside	Quinone reductase 2	NQO2	P16083
F15	kaempferol 3-O-α-L-arabinopyranosyl-(1'''->6'')-β-D-glucopyranoside	Xanthine dehydrogenase	XDH	P47989
F15	kaempferol 3-O-α-L-arabinopyranosyl-(1'''->6'')-β-D-glucopyranoside	Lymphocyte differentiation antigen CD38	CD38	P28907
F15	kaempferol 3-O-α-L-arabinopyranosyl-(1'''->6'')-β-D-glucopyranoside	Cyclooxygenase-2	PTGS2	P35354
F15	kaempferol 3-O-α-L-arabinopyranosyl-(1'''->6'')-β-D-glucopyranoside	Adenosine A1 receptor (by homology)	ADORA1	P30542
F15	kaempferol 3-O-α-L-arabinopyranosyl-(1'''->6'')-β-D-glucopyranoside	TNF-alpha	TNF	P01375
F15	kaempferol 3-O-α-L-arabinopyranosyl-(1'''->6'')-β-D-glucopyranoside	Interleukin-2	IL2	P60568
F15	kaempferol 3-O-α-L-arabinopyranosyl-(1'''->6'')-β-D-glucopyranoside	Phosphodiesterase 5A	PDE5A	O76074
F15	kaempferol 3-O-α-L-arabinopyranosyl-(1'''->6'')-β-D-glucopyranoside	Arachidonate 5-lipoxygenase	ALOX5	P09917
F16	3-O-[β-D-xylopyranosyl-(1->2)-β-D-glucopyranosyl]-kaempferol	Neuromedin-U receptor 2	NMUR2	Q9GZQ4
F16	3-O-[β-D-xylopyranosyl-(1->2)-β-D-glucopyranosyl]-kaempferol	Alpha-2a adrenergic receptor	ADRA2A	P08913
F16	3-O-[β-D-xylopyranosyl-(1->2)-β-D-glucopyranosyl]-kaempferol	Adrenergic receptor alpha-2	ADRA2C	P18825
F16	3-O-[β-D-xylopyranosyl-(1->2)-β-D-glucopyranosyl]-kaempferol	Acetylcholinesterase	ACHE	P22303
F16	3-O-[β-D-xylopyranosyl-(1->2)-β-D-glucopyranosyl]-kaempferol	Aldose reductase (by homology)	AKR1B1	P15121
F16	3-O-[β-D-xylopyranosyl-(1->2)-β-D-glucopyranosyl]-kaempferol	Carbonic anhydrase II	CA2	P00918
F16	3-O-[β-D-xylopyranosyl-(1->2)-β-D-glucopyranosyl]-kaempferol	Carbonic anhydrase VII	CA7	P43166
F16	3-O-[β-D-xylopyranosyl-(1->2)-β-D-glucopyranosyl]-kaempferol	Carbonic anhydrase XII	CA12	O43570
F16	3-O-[β-D-xylopyranosyl-(1->2)-β-D-glucopyranosyl]-kaempferol	Carbonic anhydrase IV	CA4	P22748
F16	3-O-[β-D-xylopyranosyl-(1->2)-β-D-glucopyranosyl]-kaempferol	NADPH oxidase 4	NOX4	Q9NPH5
F16	3-O-[β-D-xylopyranosyl-(1->2)-β-D-glucopyranosyl]-kaempferol	Ribosomal protein S6 kinase alpha 3	RPS6KA3	P51812
F16	3-O-[β-D-xylopyranosyl-(1->2)-β-D-glucopyranosyl]-kaempferol	Quinone reductase 2	NQO2	P16083
F16	3-O-[β-D-xylopyranosyl-(1->2)-β-D-glucopyranosyl]-kaempferol	Xanthine dehydrogenase	XDH	P47989
F16	3-O-[β-D-xylopyranosyl-(1->2)-β-D-glucopyranosyl]-kaempferol	Phosphodiesterase 5A	PDE5A	O76074
F16	3-O-[β-D-xylopyranosyl-(1->2)-β-D-glucopyranosyl]-kaempferol	Lymphocyte differentiation antigen CD38	CD38	P28907
F16	3-O-[β-D-xylopyranosyl-(1->2)-β-D-glucopyranosyl]-kaempferol	Cyclooxygenase-2	PTGS2	P35354
F16	3-O-[β-D-xylopyranosyl-(1->2)-β-D-glucopyranosyl]-kaempferol	Adenosine A1 receptor (by homology)	ADORA1	P30542
F16	3-O-[β-D-xylopyranosyl-(1->2)-β-D-glucopyranosyl]-kaempferol	TNF-alpha	TNF	P01375
F16	3-O-[β-D-xylopyranosyl-(1->2)-β-D-glucopyranosyl]-kaempferol	Interleukin-2	IL2	P60568
F16	3-O-[β-D-xylopyranosyl-(1->2)-β-D-glucopyranosyl]-kaempferol	Arachidonate 5-lipoxygenase	ALOX5	P09917
F17	kaempferol-3-rutinoside	Neuromedin-U receptor 2	NMUR2	Q9GZQ4
F17	kaempferol-3-rutinoside	Alpha-2a adrenergic receptor	ADRA2A	P08913
F17	kaempferol-3-rutinoside	Adrenergic receptor alpha-2	ADRA2C	P18825
F17	kaempferol-3-rutinoside	Acetylcholinesterase	ACHE	P22303
F17	kaempferol-3-rutinoside	Aldose reductase (by homology)	AKR1B1	P15121
F17	kaempferol-3-rutinoside	Carbonic anhydrase VII	CA7	P43166
F17	kaempferol-3-rutinoside	Carbonic anhydrase XII	CA12	O43570
F17	kaempferol-3-rutinoside	Carbonic anhydrase IV	CA4	P22748
F17	kaempferol-3-rutinoside	Carbonic anhydrase II	CA2	P00918
F17	kaempferol-3-rutinoside	NADPH oxidase 4	NOX4	Q9NPH5
F17	kaempferol-3-rutinoside	Quinone reductase 2	NQO2	P16083
F17	kaempferol-3-rutinoside	Ribosomal protein S6 kinase alpha 3	RPS6KA3	P51812
F17	kaempferol-3-rutinoside	Xanthine dehydrogenase	XDH	P47989
F17	kaempferol-3-rutinoside	Lymphocyte differentiation antigen CD38	CD38	P28907
F17	kaempferol-3-rutinoside	Cyclooxygenase-2	PTGS2	P35354
F17	kaempferol-3-rutinoside	Phosphodiesterase 5A	PDE5A	O76074
F17	kaempferol-3-rutinoside	Adenosine A1 receptor (by homology)	ADORA1	P30542
F17	kaempferol-3-rutinoside	TNF-alpha	TNF	P01375
F17	kaempferol-3-rutinoside	Interleukin-2	IL2	P60568
F17	kaempferol-3-rutinoside	Arachidonate 5-lipoxygenase	ALOX5	P09917
F18	isorhamnetin 3-O-neohesperidoside	Neuromedin-U receptor 2	NMUR2	Q9GZQ4
F18	isorhamnetin 3-O-neohesperidoside	Alpha-2a adrenergic receptor	ADRA2A	P08913
F18	isorhamnetin 3-O-neohesperidoside	Adrenergic receptor alpha-2	ADRA2C	P18825
F18	isorhamnetin 3-O-neohesperidoside	Acetylcholinesterase	ACHE	P22303
F18	isorhamnetin 3-O-neohesperidoside	Aldose reductase (by homology)	AKR1B1	P15121
F18	isorhamnetin 3-O-neohesperidoside	Carbonic anhydrase VII	CA7	P43166
F18	isorhamnetin 3-O-neohesperidoside	Carbonic anhydrase XII	CA12	O43570
F18	isorhamnetin 3-O-neohesperidoside	Carbonic anhydrase IV	CA4	P22748
F18	isorhamnetin 3-O-neohesperidoside	Quinone reductase 2	NQO2	P16083
F18	isorhamnetin 3-O-neohesperidoside	NADPH oxidase 4	NOX4	Q9NPH5
F18	isorhamnetin 3-O-neohesperidoside	Ribosomal protein S6 kinase alpha 3	RPS6KA3	P51812
F18	isorhamnetin 3-O-neohesperidoside	Carbonic anhydrase II	CA2	P00918
F18	isorhamnetin 3-O-neohesperidoside	Cyclooxygenase-2	PTGS2	P35354
F18	isorhamnetin 3-O-neohesperidoside	Xanthine dehydrogenase	XDH	P47989
F18	isorhamnetin 3-O-neohesperidoside	Lymphocyte differentiation antigen CD38	CD38	P28907
F18	isorhamnetin 3-O-neohesperidoside	Phosphodiesterase 5A	PDE5A	O76074
F18	isorhamnetin 3-O-neohesperidoside	TNF-alpha	TNF	P01375
F18	isorhamnetin 3-O-neohesperidoside	Interleukin-2	IL2	P60568
F18	isorhamnetin 3-O-neohesperidoside	Adenosine A1 receptor (by homology)	ADORA1	P30542
F18	isorhamnetin 3-O-neohesperidoside	Arachidonate 5-lipoxygenase	ALOX5	P09917
F18	isorhamnetin 3-O-neohesperidoside	Telomerase reverse transcriptase	TERT	O14746
F19	kaempferol 3-O-β-D-(2-O-β-D-6-O-acetylglucosyl)-glucopyranoside	Neuromedin-U receptor 2	NMUR2	Q9GZQ4
F19	kaempferol 3-O-β-D-(2-O-β-D-6-O-acetylglucosyl)-glucopyranoside	Alpha-2a adrenergic receptor	ADRA2A	P08913
F19	kaempferol 3-O-β-D-(2-O-β-D-6-O-acetylglucosyl)-glucopyranoside	Adrenergic receptor alpha-2	ADRA2C	P18825
F19	kaempferol 3-O-β-D-(2-O-β-D-6-O-acetylglucosyl)-glucopyranoside	Acetylcholinesterase	ACHE	P22303
F19	kaempferol 3-O-β-D-(2-O-β-D-6-O-acetylglucosyl)-glucopyranoside	Aldose reductase (by homology)	AKR1B1	P15121
F19	kaempferol 3-O-β-D-(2-O-β-D-6-O-acetylglucosyl)-glucopyranoside	Quinone reductase 2	NQO2	P16083
F19	kaempferol 3-O-β-D-(2-O-β-D-6-O-acetylglucosyl)-glucopyranoside	NADPH oxidase 4	NOX4	Q9NPH5
F19	kaempferol 3-O-β-D-(2-O-β-D-6-O-acetylglucosyl)-glucopyranoside	Ribosomal protein S6 kinase alpha 3	RPS6KA3	P51812
F19	kaempferol 3-O-β-D-(2-O-β-D-6-O-acetylglucosyl)-glucopyranoside	Carbonic anhydrase VII	CA7	P43166
F19	kaempferol 3-O-β-D-(2-O-β-D-6-O-acetylglucosyl)-glucopyranoside	Carbonic anhydrase XII	CA12	O43570
F19	kaempferol 3-O-β-D-(2-O-β-D-6-O-acetylglucosyl)-glucopyranoside	Carbonic anhydrase IV	CA4	P22748
F19	kaempferol 3-O-β-D-(2-O-β-D-6-O-acetylglucosyl)-glucopyranoside	Cyclooxygenase-2	PTGS2	P35354
F19	kaempferol 3-O-β-D-(2-O-β-D-6-O-acetylglucosyl)-glucopyranoside	Carbonic anhydrase II	CA2	P00918
F19	kaempferol 3-O-β-D-(2-O-β-D-6-O-acetylglucosyl)-glucopyranoside	Xanthine dehydrogenase	XDH	P47989
F19	kaempferol 3-O-β-D-(2-O-β-D-6-O-acetylglucosyl)-glucopyranoside	Phosphodiesterase 5A	PDE5A	O76074
F19	kaempferol 3-O-β-D-(2-O-β-D-6-O-acetylglucosyl)-glucopyranoside	Lymphocyte differentiation antigen CD38	CD38	P28907
F19	kaempferol 3-O-β-D-(2-O-β-D-6-O-acetylglucosyl)-glucopyranoside	Adenosine A1 receptor (by homology)	ADORA1	P30542
F19	kaempferol 3-O-β-D-(2-O-β-D-6-O-acetylglucosyl)-glucopyranoside	TNF-alpha	TNF	P01375
F19	kaempferol 3-O-β-D-(2-O-β-D-6-O-acetylglucosyl)-glucopyranoside	Interleukin-2	IL2	P60568
F19	kaempferol 3-O-β-D-(2-O-β-D-6-O-acetylglucosyl)-glucopyranoside	Arachidonate 5-lipoxygenase	ALOX5	P09917
F2	kaempferol-3-O-sophoroside	Neuromedin-U receptor 2	NMUR2	Q9GZQ4
F2	kaempferol-3-O-sophoroside	Alpha-2a adrenergic receptor	ADRA2A	P08913
F2	kaempferol-3-O-sophoroside	Adrenergic receptor alpha-2	ADRA2C	P18825
F2	kaempferol-3-O-sophoroside	Acetylcholinesterase	ACHE	P22303
F2	kaempferol-3-O-sophoroside	Aldose reductase (by homology)	AKR1B1	P15121
F2	kaempferol-3-O-sophoroside	Carbonic anhydrase VII	CA7	P43166
F2	kaempferol-3-O-sophoroside	Carbonic anhydrase XII	CA12	O43570
F2	kaempferol-3-O-sophoroside	Carbonic anhydrase IV	CA4	P22748
F2	kaempferol-3-O-sophoroside	Carbonic anhydrase II	CA2	P00918
F2	kaempferol-3-O-sophoroside	Ribosomal protein S6 kinase alpha 3	RPS6KA3	P51812
F2	kaempferol-3-O-sophoroside	NADPH oxidase 4	NOX4	Q9NPH5
F2	kaempferol-3-O-sophoroside	Quinone reductase 2	NQO2	P16083
F2	kaempferol-3-O-sophoroside	Xanthine dehydrogenase	XDH	P47989
F2	kaempferol-3-O-sophoroside	Phosphodiesterase 5A	PDE5A	O76074
F2	kaempferol-3-O-sophoroside	Lymphocyte differentiation antigen CD38	CD38	P28907
F2	kaempferol-3-O-sophoroside	Cyclooxygenase-2	PTGS2	P35354
F2	kaempferol-3-O-sophoroside	Adenosine A1 receptor (by homology)	ADORA1	P30542
F2	kaempferol-3-O-sophoroside	TNF-alpha	TNF	P01375
F2	kaempferol-3-O-sophoroside	Interleukin-2	IL2	P60568
F2	kaempferol-3-O-sophoroside	Arachidonate 5-lipoxygenase	ALOX5	P09917
F20	naringenin	Cytochrome P450 19A1	CYP19A1	P11511
F20	naringenin	Carbonic anhydrase VII	CA7	P43166
F20	naringenin	Multidrug resistance-associated protein 1	ABCC1	P33527
F20	naringenin	Estradiol 17-beta-dehydrogenase 1	HSD17B1	P14061
F20	naringenin	Carbonic anhydrase XII	CA12	O43570
F20	naringenin	Testis-specific androgen-binding protein	SHBG	P04278
F20	naringenin	Carbonic anhydrase IV	CA4	P22748
F20	naringenin	Cytochrome P450 1B1	CYP1B1	Q16678
F20	naringenin	Carbonyl reductase [NADPH] 1	CBR1	P16152
F20	naringenin	Estrogen receptor alpha	ESR1	P03372
F20	naringenin	Estrogen receptor beta	ESR2	Q92731
F20	naringenin	Cyclooxygenase-1	PTGS1	P23219
F20	naringenin	Monoamine oxidase B	MAOB	P27338
F20	naringenin	Adenosine A1 receptor	ADORA1	P30542
F20	naringenin	Adenosine A3 receptor	ADORA3	P0DMS8
F20	naringenin	ATP-binding cassette sub-family G member 2	ABCG2	Q9UNQ0
F20	naringenin	Taste receptor type 2 member 31	TAS2R31	P59538
F20	naringenin	Aldo-keto-reductase family 1 member C3	AKR1C3	P42330
F20	naringenin	Phospholipase A2 group 1B	PLA2G1B	P04054
F20	naringenin	Metabotropic glutamate receptor 5	GRM5	P41594
F20	naringenin	Acyl coenzyme A:cholesterol acyltransferase	CES1	P23141
F20	naringenin	Peroxisome proliferator-activated receptor gamma	PPARG	P37231
F20	naringenin	Carboxylesterase 2	CES2	O00748
F20	naringenin	Sodium/glucose cotransporter 2	SLC5A2	P31639
F20	naringenin	Matrix metalloproteinase 12	MMP12	P39900
F20	naringenin	DNA polymerase beta (by homology)	POLB	P06746
F20	naringenin	Matrix metalloproteinase 13	MMP13	P45452
F20	naringenin	Phospholipase A2 group IIA	PLA2G2A	P14555
F20	naringenin	Phospholipase A2 group V	PLA2G5	P39877
F20	naringenin	Group X secretory phospholipase A2	PLA2G10	O15496
F20	naringenin	Beta-secretase 1	BACE1	P56817
F20	naringenin	Neuronal acetylcholine receptor protein alpha-7 subunit	CHRNA7	P36544
F20	naringenin	Kallikrein 1	KLK1	P06870
F20	naringenin	Kallikrein 2	KLK2	P20151
F20	naringenin	Retinoid X receptor alpha	RXRA	P19793
F20	naringenin	Plasminogen activator inhibitor-1	SERPINE1	P05121
F20	naringenin	Tyrosine-protein kinase SRC	SRC	P12931
F20	naringenin	Carbonic anhydrase II	CA2	P00918
F20	naringenin	Carbonic anhydrase I	CA1	P00915
F20	naringenin	17-beta-hydroxysteroid dehydrogenase 14	HSD17B14	Q9BPX1
F20	naringenin	Stem cell growth factor receptor	KIT	P10721
F20	naringenin	Vascular endothelial growth factor receptor 2	KDR	P35968
F20	naringenin	Fibroblast growth factor receptor 1	FGFR1	P11362
F20	naringenin	Hepatocyte growth factor receptor	MET	P08581
F20	naringenin	Carbonic anhydrase III	CA3	P07451
F20	naringenin	Carbonic anhydrase VI	CA6	P23280
F20	naringenin	Carbonic anhydrase XIII	CA13	Q8N1Q1
F20	naringenin	Carbonic anhydrase VB	CA5B	Q9Y2D0
F20	naringenin	Carbonic anhydrase VA	CA5A	P35218
F20	naringenin	Quinone reductase 2	NQO2	P16083
F20	naringenin	Cathepsin (B and K)	CTSB	P07858
F20	naringenin	NADPH oxidase 4	NOX4	Q9NPH5
F20	naringenin	Aldose reductase	AKR1B1	P15121
F20	naringenin	Dual specificty protein kinase CLK1	CLK1	P49759
F20	naringenin	Dual specificity tyrosine-phosphorylation-regulated kinase 1B	DYRK1B	Q9Y463
F20	naringenin	Butyrylcholinesterase	BCHE	P06276
F20	naringenin	Carbonic anhydrase IX	CA9	Q16790
F20	naringenin	Estrogen-related receptor alpha	ESRRA	P11474
F20	naringenin	Estrogen-related receptor beta	ESRRB	O95718
F20	naringenin	Cyclin-dependent kinase 5/CDK5 activator 1	CDK5R1 CDK5	Q15078 Q00535
F20	naringenin	Insulin-like growth factor I receptor	IGF1R	P08069
F20	naringenin	Insulin receptor	INSR	P06213
F20	naringenin	Dual-specificity tyrosine-phosphorylation regulated kinase 1A	DYRK1A	Q13627
F20	naringenin	Estradiol 17-beta-dehydrogenase 2	HSD17B2	P37059
F20	naringenin	Insulin-like growth factor binding protein 3	IGFBP3	P17936
F20	naringenin	Matrix metalloproteinase 2	MMP2	P08253
F20	naringenin	14-3-3 protein gamma	YWHAG	P61981
F20	naringenin	NAD-dependent deacetylase sirtuin 2	SIRT2	Q8IXJ6
F20	naringenin	Coagulation factor VII/tissue factor	F3	P13726
F20	naringenin	Prostanoid EP1 receptor	PTGER1	P34995
F20	naringenin	Prostanoid EP2 receptor	PTGER2	P43116
F20	naringenin	Prostanoid EP3 receptor	PTGER3	P43115
F20	naringenin	Apoptosis regulator Bcl-X	BCL2L1	Q07817
F20	naringenin	PI3-kinase p110-beta subunit	PIK3CB	P42338
F20	naringenin	Cytochrome P450 2C9	CYP2C9	P11712
F20	naringenin	Cytochrome P450 3A4	CYP3A4	P08684
F20	naringenin	PI3-kinase p110-alpha subunit	PIK3CA	P42336
F20	naringenin	Transitional endoplasmic reticulum ATPase	VCP	P55072
F20	naringenin	Placenta growth factor	PGF	P49763
F20	naringenin	Vascular endothelial growth factor A	VEGFA	P15692
F20	naringenin	Endothelin receptor ET-A	EDNRA	P25101
F20	naringenin	Serine/threonine-protein kinase/endoribonuclease IRE1	ERN1	O75460
F20	naringenin	Matrix metalloproteinase 3	MMP3	P08254
F20	naringenin	Beta amyloid A4 protein	APP	P05067
F20	naringenin	Glycogen synthase kinase-3 beta	GSK3B	P49841
F20	naringenin	Apoptosis regulator Bcl-2	BCL2	P10415
F20	naringenin	Matrix metalloproteinase 9	MMP9	P14780
F20	naringenin	Serine/threonine-protein kinase WEE1	WEE1	P30291
F20	naringenin	Tyrosine-protein kinase LCK	LCK	P06239
F20	naringenin	Tyrosine-protein kinase SYK	SYK	P43405
F20	naringenin	Cyclin-dependent kinase 2/cyclin E1	CCNE1 CDK2	P24864 P24941
F20	naringenin	CDK3/Cyclin E	CCNE1 CDK3	P24864 Q00526
F20	naringenin	Cyclin-dependent kinase 4	CDK4	P11802
F20	naringenin	Serine/threonine-protein kinase Aurora-A	AURKA	O14965
F20	naringenin	Alpha-synuclein	SNCA	P37840
F20	naringenin	Arachidonate 12-lipoxygenase	ALOX12	P18054
F20	naringenin	Hepatocyte nuclear factor 4-alpha	HNF4A	P41235
F21	kaempferol	NADPH oxidase 4	NOX4	Q9NPH5
F21	kaempferol	Aldose reductase (by homology)	AKR1B1	P15121
F21	kaempferol	Xanthine dehydrogenase	XDH	P47989
F21	kaempferol	Tyrosinase	TYR	P14679
F21	kaempferol	Tyrosine-protein kinase receptor FLT3	FLT3	P36888
F21	kaempferol	Carbonic anhydrase II	CA2	P00918
F21	kaempferol	Arachidonate 5-lipoxygenase	ALOX5	P09917
F21	kaempferol	Carbonic anhydrase VII	CA7	P43166
F21	kaempferol	Estradiol 17-beta-dehydrogenase 2	HSD17B2	P37059
F21	kaempferol	Multidrug resistance-associated protein 1	ABCC1	P33527
F21	kaempferol	Estradiol 17-beta-dehydrogenase 1	HSD17B1	P14061
F21	kaempferol	Aryl hydrocarbon receptor	AHR	P35869
F21	kaempferol	Carbonic anhydrase XII	CA12	O43570
F21	kaempferol	Estrogen-related receptor alpha	ESRRA	P11474
F21	kaempferol	P-glycoprotein 1	ABCB1	P08183
F21	kaempferol	Cytochrome P450 1B1	CYP1B1	Q16678
F21	kaempferol	ATP-binding cassette sub-family G member 2	ABCG2	Q9UNQ0
F21	kaempferol	Adenosine A1 receptor (by homology)	ADORA1	P30542
F21	kaempferol	Carbonic anhydrase IV	CA4	P22748
F21	kaempferol	Acetylcholinesterase	ACHE	P22303
F21	kaempferol	Monoamine oxidase A	MAOA	P21397
F21	kaempferol	Glyoxalase I	GLO1	Q04760
F21	kaempferol	Tyrosine-protein kinase SYK	SYK	P43405
F21	kaempferol	Glycogen synthase kinase-3 beta	GSK3B	P49841
F21	kaempferol	Matrix metalloproteinase 9	MMP9	P14780
F21	kaempferol	Matrix metalloproteinase 2	MMP2	P08253
F21	kaempferol	Arachidonate 15-lipoxygenase	ALOX15	P16050
F21	kaempferol	Arachidonate 12-lipoxygenase	ALOX12	P18054
F21	kaempferol	Receptor-type tyrosine-protein phosphatase S	PTPRS	Q13332
F21	kaempferol	Adenosine A2a receptor (by homology)	ADORA2A	P29274
F21	kaempferol	Cyclin-dependent kinase 5/CDK5 activator 1	CDK5R1 CDK5	Q15078 Q00535
F21	kaempferol	Cyclin-dependent kinase 1/cyclin B	CCNB3 CDK1 CCNB1 CCNB2	Q8WWL7 P06493 P14635 O95067
F21	kaempferol	Arginase-1 (by homology)	ARG1	P05089
F21	kaempferol	G-protein coupled receptor 35	GPR35	Q9HC97
F21	kaempferol	Estrogen receptor beta	ESR2	Q92731
F21	kaempferol	Death-associated protein kinase 1	DAPK1	P53355
F21	kaempferol	DNA-3-methyladenine glycosylase	MPG	P29372
F21	kaempferol	Solute carrier family 22 member 12	SLC22A12	Q96S37
F21	kaempferol	Transthyretin	TTR	P02766
F21	kaempferol	Aldo-keto reductase family 1 member B10	AKR1B10	O60218
F21	kaempferol	Tankyrase-2	TNKS2	Q9H2K2
F21	kaempferol	Tankyrase-1	TNKS	O95271
F21	kaempferol	Cyclin-dependent kinase 6	CDK6	Q00534
F21	kaempferol	Cyclin-dependent kinase 2	CDK2	P24941
F21	kaempferol	Cytochrome P450 19A1	CYP19A1	P11511
F21	kaempferol	Casein kinase II alpha	CSNK2A1	P68400
F21	kaempferol	Epidermal growth factor receptor erbB1	EGFR	P00533
F21	kaempferol	Vasopressin V2 receptor	AVPR2	P30518
F21	kaempferol	Insulin-like growth factor I receptor	IGF1R	P08069
F21	kaempferol	Thrombin	F2	P00734
F21	kaempferol	Serine/threonine-protein kinase PIM1	PIM1	P11309
F21	kaempferol	Serine/threonine-protein kinase Aurora-B	AURKB	Q96GD4
F21	kaempferol	Dopamine D4 receptor	DRD4	P21917
F21	kaempferol	Myeloperoxidase	MPO	P05164
F21	kaempferol	PI3-kinase p85-alpha subunit	PIK3R1	P27986
F21	kaempferol	Liver glycogen phosphorylase	PYGL	P06737
F21	kaempferol	Carbonic anhydrase I	CA1	P00915
F21	kaempferol	Tyrosine-protein kinase SRC	SRC	P12931
F21	kaempferol	Focal adhesion kinase 1	PTK2	Q05397
F21	kaempferol	Vascular endothelial growth factor receptor 2	KDR	P35968
F21	kaempferol	Matrix metalloproteinase 13	MMP13	P45452
F21	kaempferol	Matrix metalloproteinase 3	MMP3	P08254
F21	kaempferol	Carbonic anhydrase III	CA3	P07451
F21	kaempferol	Serine/threonine-protein kinase PLK1	PLK1	P53350
F21	kaempferol	Carbonic anhydrase VI	CA6	P23280
F21	kaempferol	Cyclin-dependent kinase 1	CDK1	P06493
F21	kaempferol	Protein kinase N1	PKN1	Q16512
F21	kaempferol	Carbonic anhydrase XIV	CA14	Q9ULX7
F21	kaempferol	Carbonic anhydrase IX	CA9	Q16790
F21	kaempferol	Hepatocyte growth factor receptor	MET	P08581
F21	kaempferol	Serine/threonine-protein kinase NEK2	NEK2	P51955
F21	kaempferol	Interleukin-8 receptor A	CXCR1	P25024
F21	kaempferol	CaM kinase II beta	CAMK2B	Q13554
F21	kaempferol	ALK tyrosine kinase receptor	ALK	Q9UM73
F21	kaempferol	Serine/threonine-protein kinase AKT	AKT1	P31749
F21	kaempferol	Serine/threonine-protein kinase NEK6	NEK6	Q9HC98
F21	kaempferol	Phospholipase A2 group 1B	PLA2G1B	P04054
F21	kaempferol	Carbonic anhydrase VA	CA5A	P35218
F21	kaempferol	Beta-secretase 1	BACE1	P56817
F21	kaempferol	Tyrosine-protein kinase receptor UFO	AXL	P30530
F21	kaempferol	NUAK family SNF1-like kinase 1	NUAK1	O60285
F21	kaempferol	Aldo-keto reductase family 1 member C2 (by homology)	AKR1C2	P52895
F21	kaempferol	Aldo-keto reductase family 1 member C1 (by homology)	AKR1C1	Q04828
F21	kaempferol	Aldo-keto-reductase family 1 member C3 (by homology)	AKR1C3	P42330
F21	kaempferol	Aldo-keto reductase family 1 member C4 (by homology)	AKR1C4	P17516
F21	kaempferol	Carbonic anhydrase XIII (by homology)	CA13	Q8N1Q1
F21	kaempferol	Aldehyde reductase (by homology)	AKR1A1	P14550
F21	kaempferol	Beta amyloid A4 protein	APP	P05067
F21	kaempferol	Poly [ADP-ribose] polymerase-1	PARP1	P09874
F21	kaempferol	Matrix metalloproteinase 12	MMP12	P39900
F21	kaempferol	Lymphocyte differentiation antigen CD38	CD38	P28907
F21	kaempferol	DNA topoisomerase I (by homology)	TOP1	P11387
F21	kaempferol	Estrogen receptor alpha	ESR1	P03372
F21	kaempferol	Cyclooxygenase-2	PTGS2	P35354
F21	kaempferol	Cystic fibrosis transmembrane conductance regulator	CFTR	P13569
F21	kaempferol	6-phosphofructo-2-kinase/fructose-2,6-bisphosphatase 3	PFKFB3	Q16875
F21	kaempferol	AMY1C	AMY1A	P04745
F21	kaempferol	G protein-coupled receptor kinase 6	GRK6	P43250
F21	kaempferol	Telomerase reverse transcriptase	TERT	O14746
F21	kaempferol	Microtubule-associated protein tau	MAPT	P10636
F22	isorhamnetin	Xanthine dehydrogenase	XDH	P47989
F22	isorhamnetin	Carbonic anhydrase II	CA2	P00918
F22	isorhamnetin	Carbonic anhydrase VII	CA7	P43166
F22	isorhamnetin	Carbonic anhydrase XII	CA12	O43570
F22	isorhamnetin	Carbonic anhydrase IV	CA4	P22748
F22	isorhamnetin	Cytochrome P450 1B1	CYP1B1	Q16678
F22	isorhamnetin	Multidrug resistance-associated protein 1	ABCC1	P33527
F22	isorhamnetin	NADPH oxidase 4	NOX4	Q9NPH5
F22	isorhamnetin	Aldose reductase	AKR1B1	P15121
F22	isorhamnetin	ATP-binding cassette sub-family G member 2	ABCG2	Q9UNQ0
F22	isorhamnetin	Acetylcholinesterase	ACHE	P22303
F22	isorhamnetin	Arachidonate 15-lipoxygenase	ALOX15	P16050
F22	isorhamnetin	Arachidonate 12-lipoxygenase	ALOX12	P18054
F22	isorhamnetin	Insulin-like growth factor I receptor	IGF1R	P08069
F22	isorhamnetin	Epidermal growth factor receptor erbB1	EGFR	P00533
F22	isorhamnetin	Vasopressin V2 receptor	AVPR2	P30518
F22	isorhamnetin	Monoamine oxidase A	MAOA	P21397
F22	isorhamnetin	Tyrosine-protein kinase receptor FLT3	FLT3	P36888
F22	isorhamnetin	Cytochrome P450 19A1	CYP19A1	P11511
F22	isorhamnetin	Thrombin	F2	P00734
F22	isorhamnetin	Serine/threonine-protein kinase PIM1	PIM1	P11309
F22	isorhamnetin	Arachidonate 5-lipoxygenase	ALOX5	P09917
F22	isorhamnetin	Serine/threonine-protein kinase Aurora-B	AURKB	Q96GD4
F22	isorhamnetin	Dopamine D4 receptor	DRD4	P21917
F22	isorhamnetin	Adenosine A1 receptor (by homology)	ADORA1	P30542
F22	isorhamnetin	Glyoxalase I	GLO1	Q04760
F22	isorhamnetin	Myeloperoxidase	MPO	P05164
F22	isorhamnetin	PI3-kinase p85-alpha subunit	PIK3R1	P27986
F22	isorhamnetin	Adenosine A2a receptor (by homology)	ADORA2A	P29274
F22	isorhamnetin	Death-associated protein kinase 1	DAPK1	P53355
F22	isorhamnetin	Liver glycogen phosphorylase	PYGL	P06737
F22	isorhamnetin	Carbonic anhydrase I	CA1	P00915
F22	isorhamnetin	Glycogen synthase kinase-3 beta	GSK3B	P49841
F22	isorhamnetin	Tyrosine-protein kinase SRC	SRC	P12931
F22	isorhamnetin	Focal adhesion kinase 1	PTK2	Q05397
F22	isorhamnetin	Estradiol 17-beta-dehydrogenase 2	HSD17B2	P37059
F22	isorhamnetin	Vascular endothelial growth factor receptor 2	KDR	P35968
F22	isorhamnetin	Matrix metalloproteinase 13	MMP13	P45452
F22	isorhamnetin	Matrix metalloproteinase 3	MMP3	P08254
F22	isorhamnetin	Carbonic anhydrase III	CA3	P07451
F22	isorhamnetin	Serine/threonine-protein kinase PLK1	PLK1	P53350
F22	isorhamnetin	Carbonic anhydrase VI	CA6	P23280
F22	isorhamnetin	Cyclin-dependent kinase 1	CDK1	P06493
F22	isorhamnetin	Matrix metalloproteinase 9	MMP9	P14780
F22	isorhamnetin	Matrix metalloproteinase 2	MMP2	P08253
F22	isorhamnetin	Protein kinase N1	PKN1	Q16512
F22	isorhamnetin	Carbonic anhydrase XIV	CA14	Q9ULX7
F22	isorhamnetin	Carbonic anhydrase IX	CA9	Q16790
F22	isorhamnetin	Casein kinase II alpha	CSNK2A1	P68400
F22	isorhamnetin	Hepatocyte growth factor receptor	MET	P08581
F22	isorhamnetin	Serine/threonine-protein kinase NEK2	NEK2	P51955
F22	isorhamnetin	Interleukin-8 receptor A	CXCR1	P25024
F22	isorhamnetin	CaM kinase II beta	CAMK2B	Q13554
F22	isorhamnetin	ALK tyrosine kinase receptor	ALK	Q9UM73
F22	isorhamnetin	Serine/threonine-protein kinase AKT	AKT1	P31749
F22	isorhamnetin	P-glycoprotein 1	ABCB1	P08183
F22	isorhamnetin	Serine/threonine-protein kinase NEK6	NEK6	Q9HC98
F22	isorhamnetin	Phospholipase A2 group 1B	PLA2G1B	P04054
F22	isorhamnetin	Carbonic anhydrase VA	CA5A	P35218
F22	isorhamnetin	Beta-secretase 1	BACE1	P56817
F22	isorhamnetin	Tyrosine-protein kinase receptor UFO	AXL	P30530
F22	isorhamnetin	NUAK family SNF1-like kinase 1	NUAK1	O60285
F22	isorhamnetin	Aldo-keto reductase family 1 member C2 (by homology)	AKR1C2	P52895
F22	isorhamnetin	Aldo-keto reductase family 1 member C1 (by homology)	AKR1C1	Q04828
F22	isorhamnetin	Aldo-keto-reductase family 1 member C3 (by homology)	AKR1C3	P42330
F22	isorhamnetin	Aldo-keto reductase family 1 member C4 (by homology)	AKR1C4	P17516
F22	isorhamnetin	Carbonic anhydrase XIII (by homology)	CA13	Q8N1Q1
F22	isorhamnetin	Aldehyde reductase (by homology)	AKR1A1	P14550
F22	isorhamnetin	G-protein coupled receptor 35	GPR35	Q9HC97
F22	isorhamnetin	Microtubule-associated protein tau	MAPT	P10636
F22	isorhamnetin	Lysine-specific demethylase 4D-like	KDM4E	B2RXH2
F22	isorhamnetin	DNA topoisomerase II alpha	TOP2A	P11388
F22	isorhamnetin	Insulin receptor	INSR	P06213
F22	isorhamnetin	Myosin light chain kinase, smooth muscle	MYLK	Q15746
F22	isorhamnetin	Tyrosine-protein kinase SYK	SYK	P43405
F22	isorhamnetin	PI3-kinase p110-gamma subunit	PIK3CG	P48736
F22	isorhamnetin	DNA-(apurinic or apyrimidinic site) lyase	APEX1	P27695
F22	isorhamnetin	Cyclin-dependent kinase 5/CDK5 activator 1	CDK5R1 CDK5	Q15078 Q00535
F22	isorhamnetin	Cyclin-dependent kinase 1/cyclin B	CCNB3 CDK1 CCNB1 CCNB2	Q8WWL7 P06493 P14635 O95067
F22	isorhamnetin	Cyclin-dependent kinase 6	CDK6	Q00534
F22	isorhamnetin	Cyclin-dependent kinase 2	CDK2	P24941
F22	isorhamnetin	Arginase-1 (by homology)	ARG1	P05089
F22	isorhamnetin	Beta amyloid A4 protein	APP	P05067
F22	isorhamnetin	Induced myeloid leukemia cell differentiation protein Mcl-1	MCL1	Q07820
F22	isorhamnetin	Telomerase reverse transcriptase	TERT	O14746
F22	isorhamnetin	Tyrosinase	TYR	P14679
F22	isorhamnetin	Estradiol 17-beta-dehydrogenase 1	HSD17B1	P14061
F22	isorhamnetin	Aryl hydrocarbon receptor	AHR	P35869
F22	isorhamnetin	Estrogen-related receptor alpha	ESRRA	P11474
F22	isorhamnetin	Receptor-type tyrosine-protein phosphatase S	PTPRS	Q13332
F22	isorhamnetin	Plasminogen	PLG	P00747
F22	isorhamnetin	Estrogen receptor beta	ESR2	Q92731
F22	isorhamnetin	DNA-3-methyladenine glycosylase	MPG	P29372
F22	isorhamnetin	Solute carrier family 22 member 12	SLC22A12	Q96S37
F22	isorhamnetin	Poly [ADP-ribose] polymerase-1	PARP1	P09874
F22	isorhamnetin	Transthyretin	TTR	P02766
F22	isorhamnetin	Matrix metalloproteinase 12	MMP12	P39900
F22	isorhamnetin	Lymphocyte differentiation antigen CD38	CD38	P28907
F22	isorhamnetin	Aldo-keto reductase family 1 member B10	AKR1B10	O60218
F22	isorhamnetin	Tankyrase-2	TNKS2	Q9H2K2
F3	isorhamnetin 3-O-β-D-xylopyranosyl (1→2)-β-D-glucopyranoside	Neuromedin-U receptor 2	NMUR2	Q9GZQ4
F3	isorhamnetin 3-O-β-D-xylopyranosyl (1→2)-β-D-glucopyranoside	Alpha-2a adrenergic receptor	ADRA2A	P08913
F3	isorhamnetin 3-O-β-D-xylopyranosyl (1→2)-β-D-glucopyranoside	Adrenergic receptor alpha-2	ADRA2C	P18825
F3	isorhamnetin 3-O-β-D-xylopyranosyl (1→2)-β-D-glucopyranoside	Acetylcholinesterase	ACHE	P22303
F3	isorhamnetin 3-O-β-D-xylopyranosyl (1→2)-β-D-glucopyranoside	Aldose reductase (by homology)	AKR1B1	P15121
F3	isorhamnetin 3-O-β-D-xylopyranosyl (1→2)-β-D-glucopyranoside	Carbonic anhydrase VII	CA7	P43166
F3	isorhamnetin 3-O-β-D-xylopyranosyl (1→2)-β-D-glucopyranoside	Carbonic anhydrase XII	CA12	O43570
F3	isorhamnetin 3-O-β-D-xylopyranosyl (1→2)-β-D-glucopyranoside	Carbonic anhydrase IV	CA4	P22748
F3	isorhamnetin 3-O-β-D-xylopyranosyl (1→2)-β-D-glucopyranoside	NADPH oxidase 4	NOX4	Q9NPH5
F3	isorhamnetin 3-O-β-D-xylopyranosyl (1→2)-β-D-glucopyranoside	Carbonic anhydrase II	CA2	P00918
F3	isorhamnetin 3-O-β-D-xylopyranosyl (1→2)-β-D-glucopyranoside	Ribosomal protein S6 kinase alpha 3	RPS6KA3	P51812
F3	isorhamnetin 3-O-β-D-xylopyranosyl (1→2)-β-D-glucopyranoside	Quinone reductase 2	NQO2	P16083
F3	isorhamnetin 3-O-β-D-xylopyranosyl (1→2)-β-D-glucopyranoside	Xanthine dehydrogenase	XDH	P47989
F3	isorhamnetin 3-O-β-D-xylopyranosyl (1→2)-β-D-glucopyranoside	Lymphocyte differentiation antigen CD38	CD38	P28907
F3	isorhamnetin 3-O-β-D-xylopyranosyl (1→2)-β-D-glucopyranoside	Cyclooxygenase-2	PTGS2	P35354
F3	isorhamnetin 3-O-β-D-xylopyranosyl (1→2)-β-D-glucopyranoside	Phosphodiesterase 5A	PDE5A	O76074
F3	isorhamnetin 3-O-β-D-xylopyranosyl (1→2)-β-D-glucopyranoside	TNF-alpha	TNF	P01375
F3	isorhamnetin 3-O-β-D-xylopyranosyl (1→2)-β-D-glucopyranoside	Interleukin-2	IL2	P60568
F3	isorhamnetin 3-O-β-D-xylopyranosyl (1→2)-β-D-glucopyranoside	Adenosine A1 receptor (by homology)	ADORA1	P30542
F3	isorhamnetin 3-O-β-D-xylopyranosyl (1→2)-β-D-glucopyranoside	Arachidonate 5-lipoxygenase	ALOX5	P09917
F3	isorhamnetin 3-O-β-D-xylopyranosyl (1→2)-β-D-glucopyranoside	Telomerase reverse transcriptase	TERT	O14746
F4	quercetin-3-O-D-glucoside-7-O-D-glucoside	NADPH oxidase 4	NOX4	Q9NPH5
F4	quercetin-3-O-D-glucoside-7-O-D-glucoside	Carbonic anhydrase II	CA2	P00918
F4	quercetin-3-O-D-glucoside-7-O-D-glucoside	Carbonic anhydrase VII	CA7	P43166
F4	quercetin-3-O-D-glucoside-7-O-D-glucoside	Carbonic anhydrase XII	CA12	O43570
F4	quercetin-3-O-D-glucoside-7-O-D-glucoside	Carbonic anhydrase IV	CA4	P22748
F4	quercetin-3-O-D-glucoside-7-O-D-glucoside	Ribosomal protein S6 kinase alpha 3	RPS6KA3	P51812
F4	quercetin-3-O-D-glucoside-7-O-D-glucoside	Quinone reductase 2	NQO2	P16083
F4	quercetin-3-O-D-glucoside-7-O-D-glucoside	Adrenergic receptor alpha-2	ADRA2C	P18825
F4	quercetin-3-O-D-glucoside-7-O-D-glucoside	Aldose reductase	AKR1B1	P15121
F4	quercetin-3-O-D-glucoside-7-O-D-glucoside	Neuromedin-U receptor 2	NMUR2	Q9GZQ4
F4	quercetin-3-O-D-glucoside-7-O-D-glucoside	Alpha-2a adrenergic receptor	ADRA2A	P08913
F4	quercetin-3-O-D-glucoside-7-O-D-glucoside	Acetylcholinesterase	ACHE	P22303
F4	quercetin-3-O-D-glucoside-7-O-D-glucoside	Lymphocyte differentiation antigen CD38	CD38	P28907
F4	quercetin-3-O-D-glucoside-7-O-D-glucoside	Cyclooxygenase-2	PTGS2	P35354
F4	quercetin-3-O-D-glucoside-7-O-D-glucoside	Phosphodiesterase 5A	PDE5A	O76074
F4	quercetin-3-O-D-glucoside-7-O-D-glucoside	Xanthine dehydrogenase	XDH	P47989
F4	quercetin-3-O-D-glucoside-7-O-D-glucoside	TNF-alpha	TNF	P01375
F4	quercetin-3-O-D-glucoside-7-O-D-glucoside	Interleukin-2	IL2	P60568
F4	quercetin-3-O-D-glucoside-7-O-D-glucoside	Adenosine A1 receptor (by homology)	ADORA1	P30542
F4	quercetin-3-O-D-glucoside-7-O-D-glucoside	Arachidonate 5-lipoxygenase	ALOX5	P09917
F4	quercetin-3-O-D-glucoside-7-O-D-glucoside	Telomerase reverse transcriptase	TERT	O14746
F4	quercetin-3-O-D-glucoside-7-O-D-glucoside	Adenosine A3 receptor	ADORA3	P0DMS8
F5	astragalin	Aldose reductase (by homology)	AKR1B1	P15121
F5	astragalin	Carbonic anhydrase II	CA2	P00918
F5	astragalin	Carbonic anhydrase VII	CA7	P43166
F5	astragalin	Carbonic anhydrase XII	CA12	O43570
F5	astragalin	Carbonic anhydrase IV	CA4	P22748
F5	astragalin	Acetylcholinesterase	ACHE	P22303
F5	astragalin	NADPH oxidase 4	NOX4	Q9NPH5
F5	astragalin	Adrenergic receptor alpha-2	ADRA2C	P18825
F5	astragalin	Quinone reductase 2	NQO2	P16083
F5	astragalin	Ribosomal protein S6 kinase alpha 3	RPS6KA3	P51812
F5	astragalin	Neuromedin-U receptor 2	NMUR2	Q9GZQ4
F5	astragalin	Alpha-2a adrenergic receptor	ADRA2A	P08913
F5	astragalin	Cyclooxygenase-2	PTGS2	P35354
F5	astragalin	Lymphocyte differentiation antigen CD38	CD38	P28907
F5	astragalin	Phosphodiesterase 5A	PDE5A	O76074
F5	astragalin	Adenosine A1 receptor (by homology)	ADORA1	P30542
F5	astragalin	TNF-alpha	TNF	P01375
F5	astragalin	Interleukin-2	IL2	P60568
F5	astragalin	Xanthine dehydrogenase	XDH	P47989
F5	astragalin	Arachidonate 5-lipoxygenase	ALOX5	P09917
F5	astragalin	Equilibrative nucleoside transporter 1	SLC29A1	Q99808
F6	kaempferol 7-O-glucoside	TNF-alpha	TNF	P01375
F6	kaempferol 7-O-glucoside	Aldose reductase	AKR1B1	P15121
F6	kaempferol 7-O-glucoside	Interleukin-2	IL2	P60568
F6	kaempferol 7-O-glucoside	Adenosine A1 receptor (by homology)	ADORA1	P30542
F6	kaempferol 7-O-glucoside	Carbonic anhydrase VII	CA7	P43166
F6	kaempferol 7-O-glucoside	Carbonic anhydrase XII	CA12	O43570
F6	kaempferol 7-O-glucoside	Xanthine dehydrogenase	XDH	P47989
F6	kaempferol 7-O-glucoside	Ribosomal protein S6 kinase alpha 3	RPS6KA3	P51812
F6	kaempferol 7-O-glucoside	Carbonic anhydrase II	CA2	P00918
F6	kaempferol 7-O-glucoside	Carbonic anhydrase IV	CA4	P22748
F6	kaempferol 7-O-glucoside	Lymphocyte differentiation antigen CD38	CD38	P28907
F6	kaempferol 7-O-glucoside	Phosphodiesterase 5A	PDE5A	O76074
F6	kaempferol 7-O-glucoside	Quinone reductase 2	NQO2	P16083
F6	kaempferol 7-O-glucoside	NADPH oxidase 4	NOX4	Q9NPH5
F6	kaempferol 7-O-glucoside	Adrenergic receptor alpha-2	ADRA2C	P18825
F6	kaempferol 7-O-glucoside	Aldehyde dehydrogenase	ALDH2	P05091
F6	kaempferol 7-O-glucoside	Acetylcholinesterase	ACHE	P22303
F6	kaempferol 7-O-glucoside	Arachidonate 5-lipoxygenase	ALOX5	P09917
F6	kaempferol 7-O-glucoside	Cyclooxygenase-2	PTGS2	P35354
F6	kaempferol 7-O-glucoside	Epidermal growth factor receptor erbB1	EGFR	P00533
F6	kaempferol 7-O-glucoside	Neuromedin-U receptor 2	NMUR2	Q9GZQ4
F6	kaempferol 7-O-glucoside	Alpha-2a adrenergic receptor	ADRA2A	P08913
F6	kaempferol 7-O-glucoside	Carbonic anhydrase I	CA1	P00915
F6	kaempferol 7-O-glucoside	Equilibrative nucleoside transporter 1	SLC29A1	Q99808
F7	kaempferol 3-rhamnoside	Quinone reductase 2	NQO2	P16083
F7	kaempferol 3-rhamnoside	Aldose reductase (by homology)	AKR1B1	P15121
F7	kaempferol 3-rhamnoside	Carbonic anhydrase II	CA2	P00918
F7	kaempferol 3-rhamnoside	Carbonic anhydrase VII	CA7	P43166
F7	kaempferol 3-rhamnoside	Carbonic anhydrase XII	CA12	O43570
F7	kaempferol 3-rhamnoside	Carbonic anhydrase IV	CA4	P22748
F7	kaempferol 3-rhamnoside	Ribosomal protein S6 kinase alpha 3	RPS6KA3	P51812
F7	kaempferol 3-rhamnoside	Acetylcholinesterase	ACHE	P22303
F7	kaempferol 3-rhamnoside	NADPH oxidase 4	NOX4	Q9NPH5
F7	kaempferol 3-rhamnoside	Adrenergic receptor alpha-2	ADRA2C	P18825
F7	kaempferol 3-rhamnoside	Neuromedin-U receptor 2	NMUR2	Q9GZQ4
F7	kaempferol 3-rhamnoside	Alpha-2a adrenergic receptor	ADRA2A	P08913
F7	kaempferol 3-rhamnoside	Lymphocyte differentiation antigen CD38	CD38	P28907
F7	kaempferol 3-rhamnoside	Cyclooxygenase-2	PTGS2	P35354
F7	kaempferol 3-rhamnoside	Phosphodiesterase 5A	PDE5A	O76074
F7	kaempferol 3-rhamnoside	Adenosine A1 receptor (by homology)	ADORA1	P30542
F7	kaempferol 3-rhamnoside	Xanthine dehydrogenase	XDH	P47989
F7	kaempferol 3-rhamnoside	TNF-alpha	TNF	P01375
F7	kaempferol 3-rhamnoside	Interleukin-2	IL2	P60568
F7	kaempferol 3-rhamnoside	Equilibrative nucleoside transporter 1	SLC29A1	Q99808
F7	kaempferol 3-rhamnoside	Arachidonate 5-lipoxygenase	ALOX5	P09917
F8	isoquercetin	Aldose reductase	AKR1B1	P15121
F8	isoquercetin	Carbonic anhydrase II	CA2	P00918
F8	isoquercetin	Carbonic anhydrase VII	CA7	P43166
F8	isoquercetin	Carbonic anhydrase XII	CA12	O43570
F8	isoquercetin	Carbonic anhydrase IV	CA4	P22748
F8	isoquercetin	NADPH oxidase 4	NOX4	Q9NPH5
F8	isoquercetin	Adrenergic receptor alpha-2	ADRA2C	P18825
F8	isoquercetin	Acetylcholinesterase	ACHE	P22303
F8	isoquercetin	Quinone reductase 2	NQO2	P16083
F8	isoquercetin	Ribosomal protein S6 kinase alpha 3	RPS6KA3	P51812
F8	isoquercetin	Neuromedin-U receptor 2	NMUR2	Q9GZQ4
F8	isoquercetin	Alpha-2a adrenergic receptor	ADRA2A	P08913
F8	isoquercetin	Cyclooxygenase-2	PTGS2	P35354
F8	isoquercetin	Lymphocyte differentiation antigen CD38	CD38	P28907
F8	isoquercetin	Phosphodiesterase 5A	PDE5A	O76074
F8	isoquercetin	TNF-alpha	TNF	P01375
F8	isoquercetin	Interleukin-2	IL2	P60568
F8	isoquercetin	Adenosine A1 receptor (by homology)	ADORA1	P30542
F8	isoquercetin	Xanthine dehydrogenase	XDH	P47989
F8	isoquercetin	Arachidonate 5-lipoxygenase	ALOX5	P09917
F8	isoquercetin	Equilibrative nucleoside transporter 1	SLC29A1	Q99808
F8	isoquercetin	Telomerase reverse transcriptase	TERT	O14746
F9	isorhamnetin 3,7-O-di-β-D-glucopyranoside	NADPH oxidase 4	NOX4	Q9NPH5
F9	isorhamnetin 3,7-O-di-β-D-glucopyranoside	Carbonic anhydrase II	CA2	P00918
F9	isorhamnetin 3,7-O-di-β-D-glucopyranoside	Ribosomal protein S6 kinase alpha 3	RPS6KA3	P51812
F9	isorhamnetin 3,7-O-di-β-D-glucopyranoside	Quinone reductase 2	NQO2	P16083
F9	isorhamnetin 3,7-O-di-β-D-glucopyranoside	Adrenergic receptor alpha-2	ADRA2C	P18825
F9	isorhamnetin 3,7-O-di-β-D-glucopyranoside	Aldose reductase	AKR1B1	P15121
F9	isorhamnetin 3,7-O-di-β-D-glucopyranoside	Neuromedin-U receptor 2	NMUR2	Q9GZQ4
F9	isorhamnetin 3,7-O-di-β-D-glucopyranoside	Alpha-2a adrenergic receptor	ADRA2A	P08913
F9	isorhamnetin 3,7-O-di-β-D-glucopyranoside	Acetylcholinesterase	ACHE	P22303
F9	isorhamnetin 3,7-O-di-β-D-glucopyranoside	Carbonic anhydrase VII	CA7	P43166
F9	isorhamnetin 3,7-O-di-β-D-glucopyranoside	Carbonic anhydrase XII	CA12	O43570
F9	isorhamnetin 3,7-O-di-β-D-glucopyranoside	Carbonic anhydrase IV	CA4	P22748
F9	isorhamnetin 3,7-O-di-β-D-glucopyranoside	Lymphocyte differentiation antigen CD38	CD38	P28907
F9	isorhamnetin 3,7-O-di-β-D-glucopyranoside	Phosphodiesterase 5A	PDE5A	O76074
F9	isorhamnetin 3,7-O-di-β-D-glucopyranoside	Xanthine dehydrogenase	XDH	P47989
F9	isorhamnetin 3,7-O-di-β-D-glucopyranoside	Cyclooxygenase-2	PTGS2	P35354
F9	isorhamnetin 3,7-O-di-β-D-glucopyranoside	TNF-alpha	TNF	P01375
F9	isorhamnetin 3,7-O-di-β-D-glucopyranoside	Interleukin-2	IL2	P60568
F9	isorhamnetin 3,7-O-di-β-D-glucopyranoside	Adenosine A1 receptor (by homology)	ADORA1	P30542
F9	isorhamnetin 3,7-O-di-β-D-glucopyranoside	Arachidonate 5-lipoxygenase	ALOX5	P09917
F9	isorhamnetin 3,7-O-di-β-D-glucopyranoside	Telomerase reverse transcriptase	TERT	O14746
Glu1	sinigrin	Thymidine phosphorylase	TYMP	P19971
Glu1	sinigrin	Hypoxanthine-guanine phosphoribosyltransferase	HPRT1	P00492
Glu1	sinigrin	Lysosomal alpha-glucosidase	GAA	P10253
Glu1	sinigrin	Beta-galactoside alpha-2,6-sialyltransferase 1	ST6GAL1	P15907
Glu2	progoitrin	Hypoxanthine-guanine phosphoribosyltransferase	HPRT1	P00492
Glu2	progoitrin	Beta-galactoside alpha-2,6-sialyltransferase 1	ST6GAL1	P15907
Glu2	progoitrin	Inosine-5'-monophosphate dehydrogenase 1	IMPDH1	P20839
Glu2	progoitrin	Inosine-5'-monophosphate dehydrogenase 2	IMPDH2	P12268
Glu2	progoitrin	Adenosine A1 receptor (by homology)	ADORA1	P30542
Glu2	progoitrin	Alcohol dehydrogenase alpha chain	ADH1A	P07327
Glu3	gluconapin	Hypoxanthine-guanine phosphoribosyltransferase	HPRT1	P00492
Glu3	gluconapin	Thymidine phosphorylase (by homology)	TYMP	P19971
Glu3	gluconapin	Adenosine A1 receptor (by homology)	ADORA1	P30542
Glu3	gluconapin	Matrix metalloproteinase 3	MMP3	P08254
Glu3	gluconapin	Matrix metalloproteinase 9	MMP9	P14780
Glu3	gluconapin	Matrix metalloproteinase 1	MMP1	P03956
Glu3	gluconapin	ADAM17	ADAM17	P78536
Glu3	gluconapin	Beta-galactoside alpha-2,6-sialyltransferase 1	ST6GAL1	P15907
Glu3	gluconapin	dUTP pyrophosphatase	DUT	P33316
Glu3	gluconapin	NAALADase II	NAALAD2	Q9Y3Q0
Glu3	gluconapin	Inosine-5'-monophosphate dehydrogenase 1	IMPDH1	P20839
Glu3	gluconapin	Inosine-5'-monophosphate dehydrogenase 2	IMPDH2	P12268
Glu4	glucoraphanin	Inosine-5'-monophosphate dehydrogenase 1	IMPDH1	P20839
Glu4	glucoraphanin	Inosine-5'-monophosphate dehydrogenase 2	IMPDH2	P12268
Glu5	glucoalyssin	Matrix metalloproteinase 3	MMP3	P08254
Glu5	glucoalyssin	Matrix metalloproteinase 9	MMP9	P14780
Glu5	glucoalyssin	Matrix metalloproteinase 1	MMP1	P03956
Glu5	glucoalyssin	ADAM17	ADAM17	P78536
Glu5	glucoalyssin	Sodium/glucose cotransporter 1	SLC5A1	P13866
Glu5	glucoalyssin	Thymidine phosphorylase	TYMP	P19971
Glu5	glucoalyssin	Matrix metalloproteinase 13	MMP13	P45452
Glu5	glucoalyssin	Matrix metalloproteinase 7	MMP7	P09237
Glu5	glucoalyssin	Matrix metalloproteinase 12	MMP12	P39900
Glu5	glucoalyssin	Matrix metalloproteinase 8	MMP8	P22894
Glu5	glucoalyssin	Adenosine A1 receptor	ADORA1	P30542
Glu5	glucoalyssin	Adenosine A2a receptor	ADORA2A	P29274
Glu5	glucoalyssin	Adenosine A2b receptor	ADORA2B	P29275
Glu5	glucoalyssin	Adenosine A3 receptor	ADORA3	P0DMS8
Glu5	glucoalyssin	Sodium/glucose cotransporter 2	SLC5A2	P31639
Glu5	glucoalyssin	Low affinity sodium-glucose cotransporter	SLC5A4	Q9NY91
Glu5	glucoalyssin	DNA topoisomerase I	TOP1	P11387
Glu5	glucoalyssin	Tyrosinase	TYR	P14679
Glu5	glucoalyssin	Transforming protein p21/H-Ras-1	HRAS	P01112
Glu5	glucoalyssin	Inosine-5'-monophosphate dehydrogenase 1	IMPDH1	P20839
Glu5	glucoalyssin	Inosine-5'-monophosphate dehydrogenase 2	IMPDH2	P12268
Glu5	glucoalyssin	Carbonic anhydrase II	CA2	P00918
Glu5	glucoalyssin	Carbonic anhydrase I	CA1	P00915
Glu5	glucoalyssin	Carbonic anhydrase XII	CA12	O43570
Glu5	glucoalyssin	Carbonic anhydrase IX	CA9	Q16790
Glu5	glucoalyssin	Protein kinase C alpha	PRKCA	P17252
Glu5	glucoalyssin	Adenosine kinase	ADK	P55263
Glu5	glucoalyssin	Beta-galactoside alpha-2,6-sialyltransferase 1	ST6GAL1	P15907
Glu5	glucoalyssin	Equilibrative nucleoside transporter 1	SLC29A1	Q99808
Glu5	glucoalyssin	Carbonic anhydrase XIV	CA14	Q9ULX7
Glu5	glucoalyssin	Bifunctional protein NCOAT	OGA	O60502
Glu6	gluconasturtiin	Matrix metalloproteinase 3	MMP3	P08254
Glu6	gluconasturtiin	Matrix metalloproteinase 9	MMP9	P14780
Glu6	gluconasturtiin	Matrix metalloproteinase 1	MMP1	P03956
Glu6	gluconasturtiin	ADAM17	ADAM17	P78536
Glu6	gluconasturtiin	Adenosine kinase	ADK	P55263
Glu6	gluconasturtiin	Adenosine A1 receptor (by homology)	ADORA1	P30542
Glu6	gluconasturtiin	Adenosine A2a receptor (by homology)	ADORA2A	P29274
Glu6	gluconasturtiin	Adenosine A3 receptor	ADORA3	P0DMS8
Glu6	gluconasturtiin	Isoleucyl-tRNA synthetase	IARS	P41252
Glu6	gluconasturtiin	Transient receptor potential cation channel subfamily M member 2	TRPM2	O94759
Lip1	1,2-dilinolenoyl-sn-glycero-3-phosphocholine	P-selectin	SELP	P16109
Lip1	1,2-dilinolenoyl-sn-glycero-4-phosphocholine	Fatty acid binding protein muscle	FABP3	P05413
Lip1	1,2-dilinolenoyl-sn-glycero-5-phosphocholine	Probable G-protein coupled receptor 34 (by homology)	GPR34	Q9UPC5
Lip1	1,2-dilinolenoyl-sn-glycero-6-phosphocholine	Putative P2Y purinoceptor 10 (by homology)	P2RY10	O00398
Lip1	1,2-dilinolenoyl-sn-glycero-7-phosphocholine	Probable G-protein coupled receptor 174	GPR174	Q9BXC1
Lip1	1,2-dilinolenoyl-sn-glycero-8-phosphocholine	Platelet activating factor receptor	PTAFR	P25105
Lip1	1,2-dilinolenoyl-sn-glycero-9-phosphocholine	Autotaxin	ENPP2	Q13822
Lip1	1,2-dilinolenoyl-sn-glycero-10-phosphocholine	G-protein coupled receptor 55	GPR55	Q9Y2T6
Lip1	1,2-dilinolenoyl-sn-glycero-11-phosphocholine	Lysophosphatidic acid receptor 6	LPAR6	P43657
Lip1	1,2-dilinolenoyl-sn-glycero-12-phosphocholine	Lysophosphatidic acid receptor Edg-7	LPAR3	Q9UBY5
Lip1	1,2-dilinolenoyl-sn-glycero-13-phosphocholine	Lysophosphatidic acid receptor Edg-4	LPAR2	Q9HBW0
Lip1	1,2-dilinolenoyl-sn-glycero-14-phosphocholine	Lysophosphatidic acid receptor Edg-2	LPAR1	Q92633
Lip1	1,2-dilinolenoyl-sn-glycero-15-phosphocholine	Serine/threonine-protein kinase AKT	AKT1	P31749
Lip1	1,2-dilinolenoyl-sn-glycero-16-phosphocholine	Vanilloid receptor	TRPV1	Q8NER1
Lip1	1,2-dilinolenoyl-sn-glycero-17-phosphocholine	Lysophosphatidic acid receptor 5	LPAR5	Q9H1C0
Lip1	1,2-dilinolenoyl-sn-glycero-18-phosphocholine	Lysophosphatidic acid receptor 4	LPAR4	Q99677
Lip2	1,2-dilinoleoyl-sn-glycero-3-phosphocholine	P-selectin	SELP	P16109
Lip2	1,2-dilinoleoyl-sn-glycero-4-phosphocholine	Fatty acid binding protein muscle	FABP3	P05413
Lip2	1,2-dilinoleoyl-sn-glycero-5-phosphocholine	Probable G-protein coupled receptor 34 (by homology)	GPR34	Q9UPC5
Lip2	1,2-dilinoleoyl-sn-glycero-6-phosphocholine	Putative P2Y purinoceptor 10 (by homology)	P2RY10	O00398
Lip2	1,2-dilinoleoyl-sn-glycero-7-phosphocholine	Probable G-protein coupled receptor 174	GPR174	Q9BXC1
Lip2	1,2-dilinoleoyl-sn-glycero-8-phosphocholine	Platelet activating factor receptor	PTAFR	P25105
Lip2	1,2-dilinoleoyl-sn-glycero-9-phosphocholine	Autotaxin	ENPP2	Q13822
Lip2	1,2-dilinoleoyl-sn-glycero-10-phosphocholine	G-protein coupled receptor 55	GPR55	Q9Y2T6
Lip2	1,2-dilinoleoyl-sn-glycero-11-phosphocholine	Lysophosphatidic acid receptor 6	LPAR6	P43657
Lip2	1,2-dilinoleoyl-sn-glycero-12-phosphocholine	Lysophosphatidic acid receptor Edg-7	LPAR3	Q9UBY5
Lip2	1,2-dilinoleoyl-sn-glycero-13-phosphocholine	Lysophosphatidic acid receptor Edg-4	LPAR2	Q9HBW0
Lip2	1,2-dilinoleoyl-sn-glycero-14-phosphocholine	Lysophosphatidic acid receptor Edg-2	LPAR1	Q92633
Lip2	1,2-dilinoleoyl-sn-glycero-15-phosphocholine	Serine/threonine-protein kinase AKT	AKT1	P31749
Lip2	1,2-dilinoleoyl-sn-glycero-16-phosphocholine	Vanilloid receptor	TRPV1	Q8NER1
Lip2	1,2-dilinoleoyl-sn-glycero-17-phosphocholine	Lysophosphatidic acid receptor 5	LPAR5	Q9H1C0
Lip2	1,2-dilinoleoyl-sn-glycero-18-phosphocholine	Lysophosphatidic acid receptor 4	LPAR4	Q99677
Lip3	1-palmitoyl-2-linoleoyl-3-sn-phosphatidylcholine	Fatty acid binding protein muscle	FABP3	P05413
Lip3	1-palmitoyl-2-linoleoyl-4-sn-phosphatidylcholine	Probable G-protein coupled receptor 34 (by homology)	GPR34	Q9UPC5
Lip3	1-palmitoyl-2-linoleoyl-5-sn-phosphatidylcholine	Putative P2Y purinoceptor 10 (by homology)	P2RY10	O00398
Lip3	1-palmitoyl-2-linoleoyl-6-sn-phosphatidylcholine	Probable G-protein coupled receptor 174	GPR174	Q9BXC1
Lip3	1-palmitoyl-2-linoleoyl-7-sn-phosphatidylcholine	Platelet activating factor receptor	PTAFR	P25105
Lip3	1-palmitoyl-2-linoleoyl-8-sn-phosphatidylcholine	P-selectin	SELP	P16109
Lip3	1-palmitoyl-2-linoleoyl-9-sn-phosphatidylcholine	Autotaxin	ENPP2	Q13822
Lip3	1-palmitoyl-2-linoleoyl-10-sn-phosphatidylcholine	G-protein coupled receptor 55	GPR55	Q9Y2T6
Lip3	1-palmitoyl-2-linoleoyl-11-sn-phosphatidylcholine	Lysophosphatidic acid receptor 6	LPAR6	P43657
Lip3	1-palmitoyl-2-linoleoyl-12-sn-phosphatidylcholine	Lysophosphatidic acid receptor Edg-7	LPAR3	Q9UBY5
Lip3	1-palmitoyl-2-linoleoyl-13-sn-phosphatidylcholine	Lysophosphatidic acid receptor Edg-4	LPAR2	Q9HBW0
Lip3	1-palmitoyl-2-linoleoyl-14-sn-phosphatidylcholine	Lysophosphatidic acid receptor Edg-2	LPAR1	Q92633
Lip3	1-palmitoyl-2-linoleoyl-15-sn-phosphatidylcholine	Serine/threonine-protein kinase AKT	AKT1	P31749
Lip3	1-palmitoyl-2-linoleoyl-16-sn-phosphatidylcholine	Vanilloid receptor	TRPV1	Q8NER1
Lip3	1-palmitoyl-2-linoleoyl-17-sn-phosphatidylcholine	Lysophosphatidic acid receptor 5	LPAR5	Q9H1C0
Lip3	1-palmitoyl-2-linoleoyl-18-sn-phosphatidylcholine	Lysophosphatidic acid receptor 4	LPAR4	Q99677
Lip4	lecithin	Fatty acid binding protein muscle	FABP3	P05413
Lip4	lecithin	P-selectin	SELP	P16109
Lip4	lecithin	Probable G-protein coupled receptor 34 (by homology)	GPR34	Q9UPC5
Lip4	lecithin	Putative P2Y purinoceptor 10 (by homology)	P2RY10	O00398
Lip4	lecithin	Probable G-protein coupled receptor 174	GPR174	Q9BXC1
Lip4	lecithin	Platelet activating factor receptor	PTAFR	P25105
Lip4	lecithin	G-protein coupled receptor 55	GPR55	Q9Y2T6
Lip4	lecithin	Autotaxin	ENPP2	Q13822
Lip4	lecithin	Lysophosphatidic acid receptor 6	LPAR6	P43657
Lip4	lecithin	Lysophosphatidic acid receptor Edg-7	LPAR3	Q9UBY5
Lip4	lecithin	Lysophosphatidic acid receptor Edg-4	LPAR2	Q9HBW0
Lip4	lecithin	Lysophosphatidic acid receptor Edg-2	LPAR1	Q92633
Lip4	lecithin	Serine/threonine-protein kinase AKT	AKT1	P31749
Lip4	lecithin	Vanilloid receptor	TRPV1	Q8NER1
Lip4	lecithin	Lysophosphatidic acid receptor 5	LPAR5	Q9H1C0
Lip4	lecithin	Lysophosphatidic acid receptor 4	LPAR4	Q99677
Lip5	PC-C18:3/C18:2	P-selectin	SELP	P16109
Lip5	PC-C18:3/C18:3	Fatty acid binding protein muscle	FABP3	P05413
Lip5	PC-C18:3/C18:4	Probable G-protein coupled receptor 34 (by homology)	GPR34	Q9UPC5
Lip5	PC-C18:3/C18:5	Putative P2Y purinoceptor 10 (by homology)	P2RY10	O00398
Lip5	PC-C18:3/C18:6	Probable G-protein coupled receptor 174	GPR174	Q9BXC1
Lip5	PC-C18:3/C18:7	Platelet activating factor receptor	PTAFR	P25105
Lip5	PC-C18:3/C18:8	Autotaxin	ENPP2	Q13822
Lip5	PC-C18:3/C18:9	G-protein coupled receptor 55	GPR55	Q9Y2T6
Lip5	PC-C18:3/C18:10	Lysophosphatidic acid receptor 6	LPAR6	P43657
Lip5	PC-C18:3/C18:11	Lysophosphatidic acid receptor Edg-7	LPAR3	Q9UBY5
Lip5	PC-C18:3/C18:12	Lysophosphatidic acid receptor Edg-4	LPAR2	Q9HBW0
Lip5	PC-C18:3/C18:13	Lysophosphatidic acid receptor Edg-2	LPAR1	Q92633
Lip5	PC-C18:3/C18:14	Serine/threonine-protein kinase AKT	AKT1	P31749
Lip5	PC-C18:3/C18:15	Vanilloid receptor	TRPV1	Q8NER1
Lip5	PC-C18:3/C18:16	Lysophosphatidic acid receptor 5	LPAR5	Q9H1C0
Lip5	PC-C18:3/C18:17	Lysophosphatidic acid receptor 4	LPAR4	Q99677
Nu1	5'-Uridylic Acid	Thymidylate synthase	TYMS	P04818
Nu1	5'-Uridylic Acid	Hypoxanthine-guanine phosphoribosyltransferase	HPRT1	P00492
Nu1	5'-Uridylic Acid	Pyrimidinergic receptor P2Y4	P2RY4	P51582
Nu1	5'-Uridylic Acid	Purinergic receptor P2Y2	P2RY2	P41231
Nu1	5'-Uridylic Acid	Pyrimidinergic receptor P2Y6	P2RY6	Q15077
Nu1	5'-Uridylic Acid	UDP-N-acetylglucosamine--peptide N-acetylglucosaminyltransferase 110 kDa subunit	OGT	O15294
Nu1	5'-Uridylic Acid	DNA polymerase alpha subunit	POLA1	P09884
Nu1	5'-Uridylic Acid	Uridine 5'-monophosphate synthase	UMPS	P11172
Nu1	5'-Uridylic Acid	Thymidine kinase, cytosolic	TK1	P04183
Nu1	5'-Uridylic Acid	Cytidine deaminase	CDA	P32320
Nu1	5'-Uridylic Acid	Tyrosine-protein kinase SRC	SRC	P12931
Nu1	5'-Uridylic Acid	Fructose-1,6-bisphosphatase	FBP1	P09467
Nu1	5'-Uridylic Acid	Non-secretory ribonuclease	RNASE2	P10153
Nu1	5'-Uridylic Acid	Ribonuclease pancreatic	RNASE1	P07998
Nu1	5'-Uridylic Acid	Beta-1,4-galactosyltransferase 1	B4GALT1	P15291
Nu1	5'-Uridylic Acid	Lymphocyte differentiation antigen CD38	CD38	P28907
Nu1	5'-Uridylic Acid	Eukaryotic translation initation factor (by homology)	EIF4E	P06730
Nu1	5'-Uridylic Acid	Thymidylate kinase	DTYMK	P23919
Nu1	5'-Uridylic Acid	Adenosine deaminase (by homology)	ADA	P00813
Nu1	5'-Uridylic Acid	Purinergic receptor P2Y14	P2RY14	Q15391
Nu1	5'-Uridylic Acid	Muscle glycogen phosphorylase	PYGM	P11217
Nu1	5'-Uridylic Acid	DNA polymerase gamma subunit 1	POLG	P54098
Nu1	5'-Uridylic Acid	Beta-galactoside alpha-2,6-sialyltransferase 1	ST6GAL1	P15907
Nu1	5'-Uridylic Acid	Farnesyl diphosphate synthase	FDPS	P14324
Nu1	5'-Uridylic Acid	Inosine-5'-monophosphate dehydrogenase 2	IMPDH2	P12268
Nu1	5'-Uridylic Acid	dUTP pyrophosphatase	DUT	P33316
Nu1	5'-Uridylic Acid	Butyrylcholinesterase	BCHE	P06276
Nu1	5'-Uridylic Acid	Carbonic anhydrase II	CA2	P00918
Nu1	5'-Uridylic Acid	Carbonic anhydrase I	CA1	P00915
Nu1	5'-Uridylic Acid	Carbonic anhydrase XII	CA12	O43570
Nu1	5'-Uridylic Acid	Carbonic anhydrase IX	CA9	Q16790
Nu2	uridine	Cytidine deaminase	CDA	P32320
Nu2	uridine	Adenosine deaminase (by homology)	ADA	P00813
Nu2	uridine	Muscle glycogen phosphorylase	PYGM	P11217
Nu2	uridine	Thymidine kinase, cytosolic	TK1	P04183
Nu2	uridine	Thymidylate synthase (by homology)	TYMS	P04818
Nu2	uridine	Adenosine A1 receptor	ADORA1	P30542
Nu2	uridine	Thymidine kinase, mitochondrial (by homology)	TK2	O00142
Nu2	uridine	Pyrimidinergic receptor P2Y6	P2RY6	Q15077
Nu2	uridine	UDP-N-acetylglucosamine--peptide N-acetylglucosaminyltransferase 110 kDa subunit	OGT	O15294
Nu2	uridine	Beta-hexosaminidase subunit alpha	HEXA	P06865
Nu2	uridine	Beta-N-acetyl-D-hexosaminidase-A/B	HEXB	P07686
Nu2	uridine	Bifunctional protein NCOAT	OGA	O60502
Nu2	uridine	Carbonic anhydrase II	CA2	P00918
Nu2	uridine	Carbonic anhydrase XII	CA12	O43570
Nu2	uridine	Carbonic anhydrase IX	CA9	Q16790
Nu2	uridine	Pyrimidinergic receptor P2Y4	P2RY4	P51582
Nu2	uridine	Purinergic receptor P2Y2	P2RY2	P41231
Nu2	uridine	Alpha-L-fucosidase I	FUCA1	P04066
Nu2	uridine	Adenosine A2a receptor	ADORA2A	P29274
Nu2	uridine	Carbonic anhydrase I	CA1	P00915
Nu2	uridine	Gamma-glutamyl hydrolase	GGH	Q92820
Nu2	uridine	Adenosine kinase	ADK	P55263
Nu2	uridine	Liver glycogen phosphorylase (by homology)	PYGL	P06737
Nu2	uridine	Brain glycogen phosphorylase	PYGB	P11216
Nu2	uridine	Dipeptidyl peptidase IV	DPP4	P27487
Nu2	uridine	Protein-tyrosine phosphatase 1B	PTPN1	P18031
Nu2	uridine	T-cell protein-tyrosine phosphatase	PTPN2	P17706
Nu2	uridine	DNA polymerase alpha subunit	POLA1	P09884
Nu2	uridine	Beta-glucocerebrosidase	GBA	P04062
Nu2	uridine	Lysine-specific demethylase 4D-like	KDM4E	B2RXH2
Nu2	uridine	Adenosine A3 receptor	ADORA3	P0DMS8
Nu3	5'-adenosine monophosphate	Tyrosine-protein kinase SRC	SRC	P12931
Nu3	5'-adenosine monophosphate	Fructose-1,6-bisphosphatase	FBP1	P09467
Nu3	5'-adenosine monophosphate	Hypoxanthine-guanine phosphoribosyltransferase	HPRT1	P00492
Nu3	5'-adenosine monophosphate	Bis(5'-adenosyl)-triphosphatase	FHIT	P49789
Nu3	5'-adenosine monophosphate	Glutaminyl-tRNA synthetase	QARS	P47897
Nu3	5'-adenosine monophosphate	Purinergic receptor P2Y1	P2RY1	P47900
Nu3	5'-adenosine monophosphate	Purinergic receptor P2Y11	P2RY11	Q96G91
Nu3	5'-adenosine monophosphate	MAP kinase-activated protein kinase 2	MAPKAPK2	P49137
Nu3	5'-adenosine monophosphate	Heat shock 70 kDa protein 1	HSPA1A	P0DMV8
Nu3	5'-adenosine monophosphate	Arginyl-tRNA synthetase	RARS	P54136
Nu3	5'-adenosine monophosphate	2'-deoxynucleoside 5'-phosphate N-hydrolase 1	DNPH1	O43598
Nu3	5'-adenosine monophosphate	Heat shock cognate 71 kDa protein	HSPA8	P11142
Nu3	5'-adenosine monophosphate	78 kDa glucose-regulated protein	HSPA5	P11021
Nu3	5'-adenosine monophosphate	Serine/threonine-protein kinase AKT	AKT1	P31749
Nu3	5'-adenosine monophosphate	Poly(ADP-ribose) glycohydrolase	PARG	Q86W56
Nu3	5'-adenosine monophosphate	RNase L	RNASEL	Q05823
Nu3	5'-adenosine monophosphate	Adenosine A2a receptor	ADORA2A	P29274
Nu3	5'-adenosine monophosphate	Adenosine A3 receptor	ADORA3	P0DMS8
Nu3	5'-adenosine monophosphate	Dipeptidyl peptidase IV	DPP4	P27487
Nu3	5'-adenosine monophosphate	Adenosine kinase	ADK	P55263
Nu3	5'-adenosine monophosphate	Eukaryotic translation initation factor (by homology)	EIF4E	P06730
Nu3	5'-adenosine monophosphate	P2X purinoceptor 1	P2RX1	P51575
Nu3	5'-adenosine monophosphate	Inosine-5'-monophosphate dehydrogenase 2	IMPDH2	P12268
Nu3	5'-adenosine monophosphate	Non-secretory ribonuclease	RNASE2	P10153
Nu3	5'-adenosine monophosphate	Ribonuclease pancreatic	RNASE1	P07998
Nu3	5'-adenosine monophosphate	Purinergic receptor P2Y12	P2RY12	Q9H244
Nu3	5'-adenosine monophosphate	Thymidylate synthase	TYMS	P04818
Nu3	5'-adenosine monophosphate	Ectonucleotide pyrophosphatase/phosphodiesterase family member 1	ENPP1	P22413
Nu3	5'-adenosine monophosphate	Adenylate cyclase type 10	ADCY10	Q96PN6
Nu3	5'-adenosine monophosphate	Asparagine synthetase	ASNS	P08243
Nu3	5'-adenosine monophosphate	Adenosylhomocysteinase	AHCY	P23526
Nu3	5'-adenosine monophosphate	Histone-lysine N-methyltransferase, H3 lysine-9 specific 5	EHMT1	Q9H9B1
Nu3	5'-adenosine monophosphate	Histone-lysine N-methyltransferase, H3 lysine-9 specific 3	EHMT2	Q96KQ7
Nu3	5'-adenosine monophosphate	Thymidylate kinase	DTYMK	P23919
Nu3	5'-adenosine monophosphate	Glyceraldehyde-3-phosphate dehydrogenase liver	GAPDH	P04406
Nu3	5'-adenosine monophosphate	Adenosine deaminase	ADA	P00813
Nu3	5'-adenosine monophosphate	S-adenosylmethionine decarboxylase 1	AMD1	P17707
Nu3	5'-adenosine monophosphate	Biotin--protein ligase	HLCS	P50747
Nu3	5'-adenosine monophosphate	Lymphocyte differentiation antigen CD38	CD38	P28907
Nu3	5'-adenosine monophosphate	Histone-lysine N-methyltransferase SETD7	SETD7	Q8WTS6
Nu3	5'-adenosine monophosphate	Choline acetylase	CHAT	P28329
Nu3	5'-adenosine monophosphate	Cell division control protein 42 homolog	CDC42	P60953
Nu3	5'-adenosine monophosphate	Ras-related C3 botulinum toxin substrate 1	RAC1	P63000
Nu3	5'-adenosine monophosphate	Spermidine synthase	SRM	P19623
Nu3	5'-adenosine monophosphate	Adenosine A2b receptor	ADORA2B	P29275
Nu3	5'-adenosine monophosphate	AICAR transformylase	ATIC	P31939
Nu3	5'-adenosine monophosphate	Inosine-5'-monophosphate dehydrogenase 1	IMPDH1	P20839
Nu3	5'-adenosine monophosphate	Equilibrative nucleoside transporter 1	SLC29A1	Q99808
Nu3	5'-adenosine monophosphate	Transient receptor potential cation channel subfamily M member 2	TRPM2	O94759
Nu3	5'-adenosine monophosphate	Methionyl-tRNA synthetase	MARS	P56192
Nu3	5'-adenosine monophosphate	Adenosine A1 receptor	ADORA1	P30542
Nu3	5'-adenosine monophosphate	Beta-galactoside alpha-2,6-sialyltransferase 1	ST6GAL1	P15907
Nu3	5'-adenosine monophosphate	Histone-lysine N-methyltransferase SETD2	SETD2	Q9BYW2
Nu3	5'-adenosine monophosphate	Histone-arginine methyltransferase CARM1	CARM1	Q86X55
Nu3	5'-adenosine monophosphate	Protein-arginine N-methyltransferase 1	PRMT1	Q99873
Nu3	5'-adenosine monophosphate	Butyrylcholinesterase	BCHE	P06276
Nu3	5'-adenosine monophosphate	Induced myeloid leukemia cell differentiation protein Mcl-1	MCL1	Q07820
Nu3	5'-adenosine monophosphate	Epidermal growth factor receptor erbB1	EGFR	P00533
Nu3	5'-adenosine monophosphate	Farnesyl diphosphate synthase	FDPS	P14324
Nu3	5'-adenosine monophosphate	Alcohol dehydrogenase alpha chain	ADH1A	P07327
Nu3	5'-adenosine monophosphate	Programmed cell death protein 4	PDCD4	Q53EL6
Nu3	5'-adenosine monophosphate	S-methyl-5-thioadenosine phosphorylase (by homology)	MTAP	Q13126
Nu3	5'-adenosine monophosphate	Histone acetyltransferase p300	EP300	Q09472
Nu3	5'-adenosine monophosphate	L-lactate dehydrogenase B chain	LDHB	P07195
Nu4	cyclic guanosine 3',5'-monophosphate	Hypoxanthine-guanine phosphoribosyltransferase	HPRT1	P00492
Nu4	cyclic guanosine 3',5'-monophosphate	Eukaryotic translation initation factor (by homology)	EIF4E	P06730
Nu4	cyclic guanosine 3',5'-monophosphate	Cell division control protein 42 homolog	CDC42	P60953
Nu4	cyclic guanosine 3',5'-monophosphate	Ras-related C3 botulinum toxin substrate 1	RAC1	P63000
Nu4	cyclic guanosine 3',5'-monophosphate	Lymphocyte differentiation antigen CD38	CD38	P28907
Nu4	cyclic guanosine 3',5'-monophosphate	Telomerase reverse transcriptase	TERT	O14746
Nu4	cyclic guanosine 3',5'-monophosphate	Non-secretory ribonuclease	RNASE2	P10153
Nu4	cyclic guanosine 3',5'-monophosphate	Ribonuclease pancreatic	RNASE1	P07998
Nu4	cyclic guanosine 3',5'-monophosphate	Arginyl-tRNA synthetase	RARS	P54136
Nu4	cyclic guanosine 3',5'-monophosphate	Fructose-1,6-bisphosphatase	FBP1	P09467
Nu4	cyclic guanosine 3',5'-monophosphate	DNA polymerase beta	POLB	P06746
Nu4	cyclic guanosine 3',5'-monophosphate	Glutaminyl-tRNA synthetase	QARS	P47897
Nu4	cyclic guanosine 3',5'-monophosphate	RNase L	RNASEL	Q05823
Nu4	cyclic guanosine 3',5'-monophosphate	Thymidylate kinase	DTYMK	P23919
Nu4	cyclic guanosine 3',5'-monophosphate	MAP kinase-activated protein kinase 2	MAPKAPK2	P49137
Nu4	cyclic guanosine 3',5'-monophosphate	Heat shock 70 kDa protein 1	HSPA1A	P0DMV8
Nu4	cyclic guanosine 3',5'-monophosphate	Purinergic receptor P2Y1	P2RY1	P47900
Nu4	cyclic guanosine 3',5'-monophosphate	Purinergic receptor P2Y11	P2RY11	Q96G91
Nu4	cyclic guanosine 3',5'-monophosphate	Beta-galactoside alpha-2,6-sialyltransferase 1	ST6GAL1	P15907
Nu4	cyclic guanosine 3',5'-monophosphate	2'-deoxynucleoside 5'-phosphate N-hydrolase 1	DNPH1	O43598
Nu4	cyclic guanosine 3',5'-monophosphate	Biotin--protein ligase	HLCS	P50747
Nu4	cyclic guanosine 3',5'-monophosphate	P2X purinoceptor 1	P2RX1	P51575
Nu4	cyclic guanosine 3',5'-monophosphate	Pyrimidinergic receptor P2Y6	P2RY6	Q15077
Nu4	cyclic guanosine 3',5'-monophosphate	UDP-N-acetylglucosamine--peptide N-acetylglucosaminyltransferase 110 kDa subunit	OGT	O15294
Nu4	cyclic guanosine 3',5'-monophosphate	Poly(ADP-ribose) glycohydrolase	PARG	Q86W56
Nu5	adenosine 3',5'-cyclic monophosphate	Fructose-1,6-bisphosphatase	FBP1	P09467
Nu5	adenosine 3',5'-cyclic monophosphate	Tyrosine-protein kinase SRC	SRC	P12931
Nu5	adenosine 3',5'-cyclic monophosphate	Bis(5'-adenosyl)-triphosphatase	FHIT	P49789
Nu5	adenosine 3',5'-cyclic monophosphate	Arginyl-tRNA synthetase	RARS	P54136
Nu5	adenosine 3',5'-cyclic monophosphate	Glutaminyl-tRNA synthetase	QARS	P47897
Nu5	adenosine 3',5'-cyclic monophosphate	RNase L	RNASEL	Q05823
Nu5	adenosine 3',5'-cyclic monophosphate	P2X purinoceptor 1	P2RX1	P51575
Nu5	adenosine 3',5'-cyclic monophosphate	MAP kinase-activated protein kinase 2	MAPKAPK2	P49137
Nu5	adenosine 3',5'-cyclic monophosphate	Heat shock 70 kDa protein 1	HSPA1A	P0DMV8
Nu5	adenosine 3',5'-cyclic monophosphate	Purinergic receptor P2Y1	P2RY1	P47900
Nu5	adenosine 3',5'-cyclic monophosphate	Purinergic receptor P2Y11	P2RY11	Q96G91
Nu5	adenosine 3',5'-cyclic monophosphate	Hypoxanthine-guanine phosphoribosyltransferase	HPRT1	P00492
Nu5	adenosine 3',5'-cyclic monophosphate	Non-secretory ribonuclease	RNASE2	P10153
Nu5	adenosine 3',5'-cyclic monophosphate	Ribonuclease pancreatic	RNASE1	P07998
Nu5	adenosine 3',5'-cyclic monophosphate	Poly(ADP-ribose) glycohydrolase	PARG	Q86W56
Nu5	adenosine 3',5'-cyclic monophosphate	2'-deoxynucleoside 5'-phosphate N-hydrolase 1	DNPH1	O43598
Nu5	adenosine 3',5'-cyclic monophosphate	Adenylate cyclase type 10	ADCY10	Q96PN6
Nu5	adenosine 3',5'-cyclic monophosphate	Purinergic receptor P2Y12	P2RY12	Q9H244
Nu5	adenosine 3',5'-cyclic monophosphate	78 kDa glucose-regulated protein	HSPA5	P11021
Nu5	adenosine 3',5'-cyclic monophosphate	Dipeptidyl peptidase IV	DPP4	P27487
Nu5	adenosine 3',5'-cyclic monophosphate	Ectonucleotide pyrophosphatase/phosphodiesterase family member 1	ENPP1	P22413
Nu5	adenosine 3',5'-cyclic monophosphate	Heat shock cognate 71 kDa protein	HSPA8	P11142
Nu5	adenosine 3',5'-cyclic monophosphate	Biotin--protein ligase	HLCS	P50747
Nu5	adenosine 3',5'-cyclic monophosphate	Eukaryotic translation initation factor (by homology)	EIF4E	P06730
Nu5	adenosine 3',5'-cyclic monophosphate	Asparagine synthetase	ASNS	P08243
Nu5	adenosine 3',5'-cyclic monophosphate	Serine/threonine-protein kinase AKT	AKT1	P31749
Nu5	adenosine 3',5'-cyclic monophosphate	Adenosine A1 receptor	ADORA1	P30542
Nu5	adenosine 3',5'-cyclic monophosphate	Adenosine A3 receptor	ADORA3	P0DMS8
Nu5	adenosine 3',5'-cyclic monophosphate	Choline acetylase	CHAT	P28329
Nu5	adenosine 3',5'-cyclic monophosphate	Cell division control protein 42 homolog	CDC42	P60953
Nu5	adenosine 3',5'-cyclic monophosphate	Ras-related C3 botulinum toxin substrate 1	RAC1	P63000
Nu5	adenosine 3',5'-cyclic monophosphate	DNA polymerase beta	POLB	P06746
Nu5	adenosine 3',5'-cyclic monophosphate	Thymidylate kinase	DTYMK	P23919
Nu5	adenosine 3',5'-cyclic monophosphate	Histone-lysine N-methyltransferase, H3 lysine-9 specific 5	EHMT1	Q9H9B1
Nu5	adenosine 3',5'-cyclic monophosphate	Histone-lysine N-methyltransferase, H3 lysine-9 specific 3	EHMT2	Q96KQ7
Nu5	adenosine 3',5'-cyclic monophosphate	Adenosine A2a receptor	ADORA2A	P29274
Nu5	adenosine 3',5'-cyclic monophosphate	Adenosine kinase	ADK	P55263
Nu5	adenosine 3',5'-cyclic monophosphate	S-adenosylmethionine decarboxylase 1	AMD1	P17707
Nu5	adenosine 3',5'-cyclic monophosphate	Butyrylcholinesterase	BCHE	P06276
Nu5	adenosine 3',5'-cyclic monophosphate	Histone-lysine N-methyltransferase SETD7	SETD7	Q8WTS6
Nu5	adenosine 3',5'-cyclic monophosphate	Histone acetyltransferase p300	EP300	Q09472
Nu5	adenosine 3',5'-cyclic monophosphate	Adenosylhomocysteinase	AHCY	P23526
Nu5	adenosine 3',5'-cyclic monophosphate	Methionyl-tRNA synthetase	MARS	P56192
Nu5	adenosine 3',5'-cyclic monophosphate	Lymphocyte differentiation antigen CD38	CD38	P28907
Nu5	adenosine 3',5'-cyclic monophosphate	Spermidine synthase	SRM	P19623
Nu5	adenosine 3',5'-cyclic monophosphate	Beta-galactoside alpha-2,6-sialyltransferase 1	ST6GAL1	P15907
P1	N1,N10-bis(p-coumaroyl)spermidine	Dynamin-1	DNM1	Q05193
P1	N1,N10-bis(p-coumaroyl)spermidine	Matrix metalloproteinase 9	MMP9	P14780
P1	N1,N10-bis(p-coumaroyl)spermidine	Matrix metalloproteinase 1	MMP1	P03956
P1	N1,N10-bis(p-coumaroyl)spermidine	Matrix metalloproteinase 2	MMP2	P08253
P1	N1,N10-bis(p-coumaroyl)spermidine	Sigma opioid receptor	SIGMAR1	Q99720
P1	N1,N10-bis(p-coumaroyl)spermidine	Histone acetyltransferase p300	EP300	Q09472
P1	N1,N10-bis(p-coumaroyl)spermidine	Epidermal growth factor receptor erbB1	EGFR	P00533
P1	N1,N10-bis(p-coumaroyl)spermidine	Liver glycogen phosphorylase	PYGL	P06737
P1	N1,N10-bis(p-coumaroyl)spermidine	Calpain 1	CAPN1	P07384
P1	N1,N10-bis(p-coumaroyl)spermidine	C-C chemokine receptor type 2	CCR2	P41597
P10	N1-N5-N10-N14-(Z)-tetra-p-coumaroylspermine	Dynamin-1	DNM1	Q05193
P10	N1-N5-N10-N14-(Z)-tetra-p-coumaroylspermine	Matrix metalloproteinase 9	MMP9	P14780
P10	N1-N5-N10-N14-(Z)-tetra-p-coumaroylspermine	Matrix metalloproteinase 1	MMP1	P03956
P10	N1-N5-N10-N14-(Z)-tetra-p-coumaroylspermine	Matrix metalloproteinase 2	MMP2	P08253
P10	N1-N5-N10-N14-(Z)-tetra-p-coumaroylspermine	Histone acetyltransferase p300	EP300	Q09472
P10	N1-N5-N10-N14-(Z)-tetra-p-coumaroylspermine	Liver glycogen phosphorylase	PYGL	P06737
P10	N1-N5-N10-N14-(Z)-tetra-p-coumaroylspermine	Calpain 1	CAPN1	P07384
P10	N1-N5-N10-N14-(Z)-tetra-p-coumaroylspermine	Epidermal growth factor receptor erbB1	EGFR	P00533
P10	N1-N5-N10-N14-(Z)-tetra-p-coumaroylspermine	Acetylcholinesterase	ACHE	P22303
P10	N1-N5-N10-N14-(Z)-tetra-p-coumaroylspermine	C-C chemokine receptor type 2	CCR2	P41597
P11	N1-N14-(Z)-N5-N10(E)-tetra-p-coumaroylspermine	Dynamin-1	DNM1	Q05193
P11	N1-N14-(Z)-N5-N10(E)-tetra-p-coumaroylspermine	Matrix metalloproteinase 9	MMP9	P14780
P11	N1-N14-(Z)-N5-N10(E)-tetra-p-coumaroylspermine	Acetylcholinesterase	ACHE	P22303
P11	N1-N14-(Z)-N5-N10(E)-tetra-p-coumaroylspermine	Histone acetyltransferase p300	EP300	Q09472
P11	N1-N14-(Z)-N5-N10(E)-tetra-p-coumaroylspermine	Epidermal growth factor receptor erbB1	EGFR	P00533
P11	N1-N14-(Z)-N5-N10(E)-tetra-p-coumaroylspermine	Liver glycogen phosphorylase	PYGL	P06737
P11	N1-N14-(Z)-N5-N10(E)-tetra-p-coumaroylspermine	Matrix metalloproteinase 1	MMP1	P03956
P11	N1-N14-(Z)-N5-N10(E)-tetra-p-coumaroylspermine	Matrix metalloproteinase 2	MMP2	P08253
P11	N1-N14-(Z)-N5-N10(E)-tetra-p-coumaroylspermine	Calpain 1	CAPN1	P07384
P11	N1-N14-(Z)-N5-N10(E)-tetra-p-coumaroylspermine	Butyrylcholinesterase	BCHE	P06276
P11	N1-N14-(Z)-N5-N10(E)-tetra-p-coumaroylspermine	C-C chemokine receptor type 2	CCR2	P41597
P12	N1-N14-(E)-N5-N10(Z)-tetra-p-coumaroylspermine	Epidermal growth factor receptor erbB1	EGFR	P00533
P12	N1-N14-(E)-N5-N10(Z)-tetra-p-coumaroylspermine	Dynamin-1	DNM1	Q05193
P12	N1-N14-(E)-N5-N10(Z)-tetra-p-coumaroylspermine	Butyrylcholinesterase	BCHE	P06276
P12	N1-N14-(E)-N5-N10(Z)-tetra-p-coumaroylspermine	Acetylcholinesterase	ACHE	P22303
P12	N1-N14-(E)-N5-N10(Z)-tetra-p-coumaroylspermine	Matrix metalloproteinase 9	MMP9	P14780
P12	N1-N14-(E)-N5-N10(Z)-tetra-p-coumaroylspermine	Matrix metalloproteinase 1	MMP1	P03956
P12	N1-N14-(E)-N5-N10(Z)-tetra-p-coumaroylspermine	Matrix metalloproteinase 2	MMP2	P08253
P12	N1-N14-(E)-N5-N10(Z)-tetra-p-coumaroylspermine	Dopamine D2 receptor	DRD2	P14416
P12	N1-N14-(E)-N5-N10(Z)-tetra-p-coumaroylspermine	Sigma opioid receptor	SIGMAR1	Q99720
P12	N1-N14-(E)-N5-N10(Z)-tetra-p-coumaroylspermine	Dopamine D3 receptor	DRD3	P35462
P12	N1-N14-(E)-N5-N10(Z)-tetra-p-coumaroylspermine	Histone acetyltransferase p300	EP300	Q09472
P12	N1-N14-(E)-N5-N10(Z)-tetra-p-coumaroylspermine	Liver glycogen phosphorylase	PYGL	P06737
P12	N1-N14-(E)-N5-N10(Z)-tetra-p-coumaroylspermine	Monoamine oxidase B	MAOB	P27338
P12	N1-N14-(E)-N5-N10(Z)-tetra-p-coumaroylspermine	Calpain 1	CAPN1	P07384
P12	N1-N14-(E)-N5-N10(Z)-tetra-p-coumaroylspermine	C-C chemokine receptor type 2	CCR2	P41597
P12	N1-N14-(E)-N5-N10(Z)-tetra-p-coumaroylspermine	Vascular endothelial growth factor receptor 2	KDR	P35968
P13	N1,N5,N10,N14-tetra-p-coumaroylspermine	Dynamin-1	DNM1	Q05193
P13	N1,N5,N10,N14-tetra-p-coumaroylspermine	Butyrylcholinesterase	BCHE	P06276
P13	N1,N5,N10,N14-tetra-p-coumaroylspermine	Acetylcholinesterase	ACHE	P22303
P13	N1,N5,N10,N14-tetra-p-coumaroylspermine	Matrix metalloproteinase 9	MMP9	P14780
P13	N1,N5,N10,N14-tetra-p-coumaroylspermine	Matrix metalloproteinase 1	MMP1	P03956
P13	N1,N5,N10,N14-tetra-p-coumaroylspermine	Matrix metalloproteinase 2	MMP2	P08253
P13	N1,N5,N10,N14-tetra-p-coumaroylspermine	Dopamine D2 receptor	DRD2	P14416
P13	N1,N5,N10,N14-tetra-p-coumaroylspermine	Sigma opioid receptor	SIGMAR1	Q99720
P13	N1,N5,N10,N14-tetra-p-coumaroylspermine	Dopamine D3 receptor	DRD3	P35462
P13	N1,N5,N10,N14-tetra-p-coumaroylspermine	Histone acetyltransferase p300	EP300	Q09472
P13	N1,N5,N10,N14-tetra-p-coumaroylspermine	Liver glycogen phosphorylase	PYGL	P06737
P13	N1,N5,N10,N14-tetra-p-coumaroylspermine	Monoamine oxidase B	MAOB	P27338
P13	N1,N5,N10,N14-tetra-p-coumaroylspermine	C-C chemokine receptor type 2	CCR2	P41597
P13	N1,N5,N10,N14-tetra-p-coumaroylspermine	Epidermal growth factor receptor erbB1	EGFR	P00533
P13	N1,N5,N10,N14-tetra-p-coumaroylspermine	Vascular endothelial growth factor receptor 2	KDR	P35968
P14	N1,N5,N10-(E)-tricaffeoylspermidine	Dynamin-1	DNM1	Q05193
P14	N1,N5,N10-(E)-tricaffeoylspermidine	Epidermal growth factor receptor erbB1	EGFR	P00533
P14	N1,N5,N10-(E)-tricaffeoylspermidine	Matrix metalloproteinase 1	MMP1	P03956
P14	N1,N5,N10-(E)-tricaffeoylspermidine	Monoamine oxidase B	MAOB	P27338
P14	N1,N5,N10-(E)-tricaffeoylspermidine	Histone acetyltransferase p300	EP300	Q09472
P14	N1,N5,N10-(E)-tricaffeoylspermidine	Sigma opioid receptor	SIGMAR1	Q99720
P14	N1,N5,N10-(E)-tricaffeoylspermidine	Liver glycogen phosphorylase	PYGL	P06737
P14	N1,N5,N10-(E)-tricaffeoylspermidine	Methionine aminopeptidase 2	METAP2	P50579
P14	N1,N5,N10-(E)-tricaffeoylspermidine	C-C chemokine receptor type 2	CCR2	P41597
P14	N1,N5,N10-(E)-tricaffeoylspermidine	Cyclooxygenase-2 (by homology)	PTGS2	P35354
P15	N,N'-di(coumaroyl)putrescine	Epidermal growth factor receptor erbB1	EGFR	P00533
P15	N,N'-di(coumaroyl)putrescine	Dynamin-1	DNM1	Q05193
P15	N,N'-di(coumaroyl)putrescine	Acetylcholinesterase	ACHE	P22303
P15	N,N'-di(coumaroyl)putrescine	Matrix metalloproteinase 1	MMP1	P03956
P15	N,N'-di(coumaroyl)putrescine	Matrix metalloproteinase 2	MMP2	P08253
P15	N,N'-di(coumaroyl)putrescine	Liver glycogen phosphorylase	PYGL	P06737
P15	N,N'-di(coumaroyl)putrescine	Butyrylcholinesterase	BCHE	P06276
P15	N,N'-di(coumaroyl)putrescine	Matrix metalloproteinase 9	MMP9	P14780
P15	N,N'-di(coumaroyl)putrescine	DNA polymerase beta (by homology)	POLB	P06746
P15	N,N'-di(coumaroyl)putrescine	Vascular endothelial growth factor receptor 2	KDR	P35968
P15	N,N'-di(coumaroyl)putrescine	C-C chemokine receptor type 2	CCR2	P41597
P15	N,N'-di(coumaroyl)putrescine	Tyrosine-protein kinase ABL	ABL1	P00519
P15	N,N'-di(coumaroyl)putrescine	Tyrosine-protein kinase Lyn	LYN	P07948
P15	N,N'-di(coumaroyl)putrescine	Fibroblast growth factor receptor 2	FGFR2	P21802
P15	N,N'-di(coumaroyl)putrescine	Sigma opioid receptor	SIGMAR1	Q99720
P15	N,N'-di(coumaroyl)putrescine	Glycine transporter 2	SLC6A5	Q9Y345
P2	N5,N14-dicoumaroyl- N1-caffeoylspermidine	Epidermal growth factor receptor erbB1	EGFR	P00533
P2	N5,N14-dicoumaroyl- N1-caffeoylspermidine	Dynamin-1	DNM1	Q05193
P2	N5,N14-dicoumaroyl- N1-caffeoylspermidine	Acetylcholinesterase	ACHE	P22303
P2	N5,N14-dicoumaroyl- N1-caffeoylspermidine	Matrix metalloproteinase 9	MMP9	P14780
P2	N5,N14-dicoumaroyl- N1-caffeoylspermidine	Matrix metalloproteinase 1	MMP1	P03956
P2	N5,N14-dicoumaroyl- N1-caffeoylspermidine	Matrix metalloproteinase 2	MMP2	P08253
P2	N5,N14-dicoumaroyl- N1-caffeoylspermidine	Monoamine oxidase B	MAOB	P27338
P2	N5,N14-dicoumaroyl- N1-caffeoylspermidine	Butyrylcholinesterase	BCHE	P06276
P2	N5,N14-dicoumaroyl- N1-caffeoylspermidine	Histone acetyltransferase p300	EP300	Q09472
P2	N5,N14-dicoumaroyl- N1-caffeoylspermidine	Dopamine D2 receptor	DRD2	P14416
P2	N5,N14-dicoumaroyl- N1-caffeoylspermidine	Sigma opioid receptor	SIGMAR1	Q99720
P2	N5,N14-dicoumaroyl- N1-caffeoylspermidine	Liver glycogen phosphorylase	PYGL	P06737
P2	N5,N14-dicoumaroyl- N1-caffeoylspermidine	Dopamine D3 receptor	DRD3	P35462
P2	N5,N14-dicoumaroyl- N1-caffeoylspermidine	Methionine aminopeptidase 2	METAP2	P50579
P2	N5,N14-dicoumaroyl- N1-caffeoylspermidine	C-C chemokine receptor type 2	CCR2	P41597
P2	N5,N14-dicoumaroyl- N1-caffeoylspermidine	Cyclooxygenase-2 (by homology)	PTGS2	P35354
P3	N10,N14-dicoumaroyl- N1-caffeoylspermidine	Dynamin-1	DNM1	Q05193
P3	N10,N14-dicoumaroyl- N1-caffeoylspermidine	Epidermal growth factor receptor erbB1	EGFR	P00533
P3	N10,N14-dicoumaroyl- N1-caffeoylspermidine	Matrix metalloproteinase 9	MMP9	P14780
P3	N10,N14-dicoumaroyl- N1-caffeoylspermidine	Acetylcholinesterase	ACHE	P22303
P3	N10,N14-dicoumaroyl- N1-caffeoylspermidine	Histone acetyltransferase p300	EP300	Q09472
P3	N10,N14-dicoumaroyl- N1-caffeoylspermidine	Sigma opioid receptor	SIGMAR1	Q99720
P3	N10,N14-dicoumaroyl- N1-caffeoylspermidine	Butyrylcholinesterase	BCHE	P06276
P3	N10,N14-dicoumaroyl- N1-caffeoylspermidine	Liver glycogen phosphorylase	PYGL	P06737
P3	N10,N14-dicoumaroyl- N1-caffeoylspermidine	Matrix metalloproteinase 1	MMP1	P03956
P3	N10,N14-dicoumaroyl- N1-caffeoylspermidine	Matrix metalloproteinase 2	MMP2	P08253
P3	N10,N14-dicoumaroyl- N1-caffeoylspermidine	Monoamine oxidase B	MAOB	P27338
P3	N10,N14-dicoumaroyl- N1-caffeoylspermidine	Methionine aminopeptidase 2	METAP2	P50579
P3	N10,N14-dicoumaroyl- N1-caffeoylspermidine	Cyclooxygenase-2 (by homology)	PTGS2	P35354
P4	N1,N5,N10-(Z)-tri-p-coumaroylspermidine	Epidermal growth factor receptor erbB1	EGFR	P00533
P4	N1,N5,N10-(Z)-tri-p-coumaroylspermidine	Matrix metalloproteinase 2	MMP2	P08253
P4	N1,N5,N10-(Z)-tri-p-coumaroylspermidine	Matrix metalloproteinase 9	MMP9	P14780
P4	N1,N5,N10-(Z)-tri-p-coumaroylspermidine	Matrix metalloproteinase 1	MMP1	P03956
P4	N1,N5,N10-(Z)-tri-p-coumaroylspermidine	Dynamin-1	DNM1	Q05193
P4	N1,N5,N10-(Z)-tri-p-coumaroylspermidine	Dopamine D2 receptor	DRD2	P14416
P4	N1,N5,N10-(Z)-tri-p-coumaroylspermidine	Butyrylcholinesterase	BCHE	P06276
P4	N1,N5,N10-(Z)-tri-p-coumaroylspermidine	Acetylcholinesterase	ACHE	P22303
P4	N1,N5,N10-(Z)-tri-p-coumaroylspermidine	Dopamine D3 receptor	DRD3	P35462
P4	N1,N5,N10-(Z)-tri-p-coumaroylspermidine	Sigma opioid receptor	SIGMAR1	Q99720
P4	N1,N5,N10-(Z)-tri-p-coumaroylspermidine	Histone acetyltransferase p300	EP300	Q09472
P4	N1,N5,N10-(Z)-tri-p-coumaroylspermidine	Calpain 1	CAPN1	P07384
P4	N1,N5,N10-(Z)-tri-p-coumaroylspermidine	Neuropeptide Y receptor type 1	NPY1R	P25929
P4	N1,N5,N10-(Z)-tri-p-coumaroylspermidine	Phosphodiesterase 5A	PDE5A	O76074
P4	N1,N5,N10-(Z)-tri-p-coumaroylspermidine	Aldehyde dehydrogenase	ALDH2	P05091
P4	N1,N5,N10-(Z)-tri-p-coumaroylspermidine	Serine/threonine-protein kinase B-raf	BRAF	P15056
P4	N1,N5,N10-(Z)-tri-p-coumaroylspermidine	Protein Mdm4	MDM4	O15151
P4	N1,N5,N10-(Z)-tri-p-coumaroylspermidine	p53-binding protein Mdm-2	MDM2	Q00987
P4	N1,N5,N10-(Z)-tri-p-coumaroylspermidine	Pyruvate dehydrogenase kinase isoform 1	PDK1	Q15118
P4	N1,N5,N10-(Z)-tri-p-coumaroylspermidine	Insulin receptor	INSR	P06213
P4	N1,N5,N10-(Z)-tri-p-coumaroylspermidine	Tyrosine-protein kinase ITK/TSK	ITK	Q08881
P4	N1,N5,N10-(Z)-tri-p-coumaroylspermidine	Matrix metalloproteinase 13	MMP13	P45452
P4	N1,N5,N10-(Z)-tri-p-coumaroylspermidine	Matrix metalloproteinase 14	MMP14	P50281
P4	N1,N5,N10-(Z)-tri-p-coumaroylspermidine	ADAM17	ADAM17	P78536
P4	N1,N5,N10-(Z)-tri-p-coumaroylspermidine	Bone morphogenetic protein 1	BMP1	P13497
P4	N1,N5,N10-(Z)-tri-p-coumaroylspermidine	Monoamine oxidase B	MAOB	P27338
P4	N1,N5,N10-(Z)-tri-p-coumaroylspermidine	Serine/threonine-protein kinase TAO1	TAOK1	Q7L7X3
P4	N1,N5,N10-(Z)-tri-p-coumaroylspermidine	Protein tyrosine kinase 2 beta	PTK2B	Q14289
P4	N1,N5,N10-(Z)-tri-p-coumaroylspermidine	Rho-associated protein kinase 2	ROCK2	O75116
P4	N1,N5,N10-(Z)-tri-p-coumaroylspermidine	Poly [ADP-ribose] polymerase-1	PARP1	P09874
P4	N1,N5,N10-(Z)-tri-p-coumaroylspermidine	Rho-associated protein kinase 1	ROCK1	Q13464
P4	N1,N5,N10-(Z)-tri-p-coumaroylspermidine	Neuropeptide Y receptor type 5	NPY5R	Q15761
P4	N1,N5,N10-(Z)-tri-p-coumaroylspermidine	Carnitine O-palmitoyltransferase 1, liver isoform	CPT1A	P50416
P4	N1,N5,N10-(Z)-tri-p-coumaroylspermidine	Complement factor D	CFD	P00746
P4	N1,N5,N10-(Z)-tri-p-coumaroylspermidine	Cholecystokinin A receptor (by homology)	CCKAR	P32238
P4	N1,N5,N10-(Z)-tri-p-coumaroylspermidine	Cholecystokinin B receptor	CCKBR	P32239
P4	N1,N5,N10-(Z)-tri-p-coumaroylspermidine	Serine/threonine-protein kinase Chk1	CHEK1	O14757
P4	N1,N5,N10-(Z)-tri-p-coumaroylspermidine	Dual specificity phosphatase Cdc25B	CDC25B	P30305
P4	N1,N5,N10-(Z)-tri-p-coumaroylspermidine	Histone deacetylase 3/Nuclear receptor corepressor 2 (HDAC3/NCoR2)	NCOR2 HDAC3	Q9Y618 O15379
P4	N1,N5,N10-(Z)-tri-p-coumaroylspermidine	Kinesin-like protein 1	KIF11	P52732
P4	N1,N5,N10-(Z)-tri-p-coumaroylspermidine	Vanilloid receptor (by homology)	TRPV1	Q8NER1
P5	N1,N5-(Z)-N10-(E)-tri-p-coumaroylspermidine	Epidermal growth factor receptor erbB1	EGFR	P00533
P5	N1,N5-(Z)-N10-(E)-tri-p-coumaroylspermidine	Dynamin-1	DNM1	Q05193
P5	N1,N5-(Z)-N10-(E)-tri-p-coumaroylspermidine	Matrix metalloproteinase 2	MMP2	P08253
P5	N1,N5-(Z)-N10-(E)-tri-p-coumaroylspermidine	Butyrylcholinesterase	BCHE	P06276
P5	N1,N5-(Z)-N10-(E)-tri-p-coumaroylspermidine	Acetylcholinesterase	ACHE	P22303
P5	N1,N5-(Z)-N10-(E)-tri-p-coumaroylspermidine	Matrix metalloproteinase 1	MMP1	P03956
P5	N1,N5-(Z)-N10-(E)-tri-p-coumaroylspermidine	Matrix metalloproteinase 9	MMP9	P14780
P5	N1,N5-(Z)-N10-(E)-tri-p-coumaroylspermidine	Dopamine D2 receptor	DRD2	P14416
P5	N1,N5-(Z)-N10-(E)-tri-p-coumaroylspermidine	Dopamine D3 receptor	DRD3	P35462
P5	N1,N5-(Z)-N10-(E)-tri-p-coumaroylspermidine	Sigma opioid receptor	SIGMAR1	Q99720
P5	N1,N5-(Z)-N10-(E)-tri-p-coumaroylspermidine	Neuropeptide Y receptor type 1	NPY1R	P25929
P5	N1,N5-(Z)-N10-(E)-tri-p-coumaroylspermidine	Calpain 1	CAPN1	P07384
P5	N1,N5-(Z)-N10-(E)-tri-p-coumaroylspermidine	Phosphodiesterase 5A	PDE5A	O76074
P5	N1,N5-(Z)-N10-(E)-tri-p-coumaroylspermidine	Serine/threonine-protein kinase B-raf	BRAF	P15056
P5	N1,N5-(Z)-N10-(E)-tri-p-coumaroylspermidine	Tyrosine-protein kinase JAK2	JAK2	O60674
P5	N1,N5-(Z)-N10-(E)-tri-p-coumaroylspermidine	Protein Mdm4	MDM4	O15151
P5	N1,N5-(Z)-N10-(E)-tri-p-coumaroylspermidine	p53-binding protein Mdm-2	MDM2	Q00987
P5	N1,N5-(Z)-N10-(E)-tri-p-coumaroylspermidine	Pyruvate dehydrogenase kinase isoform 1	PDK1	Q15118
P5	N1,N5-(Z)-N10-(E)-tri-p-coumaroylspermidine	Kinesin-like protein 1	KIF11	P52732
P5	N1,N5-(Z)-N10-(E)-tri-p-coumaroylspermidine	Cathepsin L	CTSL	P07711
P5	N1,N5-(Z)-N10-(E)-tri-p-coumaroylspermidine	Cathepsin (B and K)	CTSB	P07858
P5	N1,N5-(Z)-N10-(E)-tri-p-coumaroylspermidine	Rho-associated protein kinase 1	ROCK1	Q13464
P5	N1,N5-(Z)-N10-(E)-tri-p-coumaroylspermidine	Serine/threonine-protein kinase Chk1	CHEK1	O14757
P5	N1,N5-(Z)-N10-(E)-tri-p-coumaroylspermidine	Serine/threonine-protein kinase Aurora-A	AURKA	O14965
P5	N1,N5-(Z)-N10-(E)-tri-p-coumaroylspermidine	Complement factor D	CFD	P00746
P5	N1,N5-(Z)-N10-(E)-tri-p-coumaroylspermidine	Histone deacetylase 3/Nuclear receptor corepressor 2 (HDAC3/NCoR2)	NCOR2 HDAC3	Q9Y618 O15379
P5	N1,N5-(Z)-N10-(E)-tri-p-coumaroylspermidine	Proteasome Macropain subunit	PSMB2	P49721
P5	N1,N5-(Z)-N10-(E)-tri-p-coumaroylspermidine	Proteasome Macropain subunit MB1	PSMB5	P28074
P5	N1,N5-(Z)-N10-(E)-tri-p-coumaroylspermidine	Apoptosis regulator Bcl-2	BCL2	P10415
P5	N1,N5-(Z)-N10-(E)-tri-p-coumaroylspermidine	Oxytocin receptor	OXTR	P30559
P5	N1,N5-(Z)-N10-(E)-tri-p-coumaroylspermidine	Heat shock protein HSP 90-beta	HSP90AB1	P08238
P5	N1,N5-(Z)-N10-(E)-tri-p-coumaroylspermidine	TNF-alpha	TNF	P01375
P5	N1,N5-(Z)-N10-(E)-tri-p-coumaroylspermidine	Serine/threonine-protein kinase Aurora-B	AURKB	Q96GD4
P5	N1,N5-(Z)-N10-(E)-tri-p-coumaroylspermidine	Vascular endothelial growth factor receptor 2	KDR	P35968
P5	N1,N5-(Z)-N10-(E)-tri-p-coumaroylspermidine	ADAM17	ADAM17	P78536
P5	N1,N5-(Z)-N10-(E)-tri-p-coumaroylspermidine	Neurokinin 3 receptor	TACR3	P29371
P5	N1,N5-(Z)-N10-(E)-tri-p-coumaroylspermidine	Nerve growth factor receptor Trk-A	NTRK1	P04629
P5	N1,N5-(Z)-N10-(E)-tri-p-coumaroylspermidine	Hypoxia-inducible factor prolyl hydroxylase 1	EGLN2	Q96KS0
P5	N1,N5-(Z)-N10-(E)-tri-p-coumaroylspermidine	Neuropeptide Y receptor type 5	NPY5R	Q15761
P5	N1,N5-(Z)-N10-(E)-tri-p-coumaroylspermidine	Vanilloid receptor (by homology)	TRPV1	Q8NER1
P5	N1,N5-(Z)-N10-(E)-tri-p-coumaroylspermidine	Egl nine homolog 1	EGLN1	Q9GZT9
P5	N1,N5-(Z)-N10-(E)-tri-p-coumaroylspermidine	Egl nine homolog 3	EGLN3	Q9H6Z9
P5	N1,N5-(Z)-N10-(E)-tri-p-coumaroylspermidine	Monoamine oxidase B	MAOB	P27338
P5	N1,N5-(Z)-N10-(E)-tri-p-coumaroylspermidine	Aldehyde dehydrogenase	ALDH2	P05091
P5	N1,N5-(Z)-N10-(E)-tri-p-coumaroylspermidine	Matrix metalloproteinase 13	MMP13	P45452
P5	N1,N5-(Z)-N10-(E)-tri-p-coumaroylspermidine	Rho-associated protein kinase 2	ROCK2	O75116
P5	N1,N5-(Z)-N10-(E)-tri-p-coumaroylspermidine	Gastrin releasing peptide receptor	GRPR	P30550
P5	N1,N5-(Z)-N10-(E)-tri-p-coumaroylspermidine	Mu opioid receptor	OPRM1	P35372
P5	N1,N5-(Z)-N10-(E)-tri-p-coumaroylspermidine	Bone morphogenetic protein 1	BMP1	P13497
P6	N1,N10-(E)-N5-(Z)-tri-p-coumaroylspermidine	Dynamin-1	DNM1	Q05193
P6	N1,N10-(E)-N5-(Z)-tri-p-coumaroylspermidine	Epidermal growth factor receptor erbB1	EGFR	P00533
P6	N1,N10-(E)-N5-(Z)-tri-p-coumaroylspermidine	Matrix metalloproteinase 9	MMP9	P14780
P6	N1,N10-(E)-N5-(Z)-tri-p-coumaroylspermidine	Sigma opioid receptor	SIGMAR1	Q99720
P6	N1,N10-(E)-N5-(Z)-tri-p-coumaroylspermidine	Histone acetyltransferase p300	EP300	Q09472
P6	N1,N10-(E)-N5-(Z)-tri-p-coumaroylspermidine	Acetylcholinesterase	ACHE	P22303
P6	N1,N10-(E)-N5-(Z)-tri-p-coumaroylspermidine	Matrix metalloproteinase 1	MMP1	P03956
P6	N1,N10-(E)-N5-(Z)-tri-p-coumaroylspermidine	Liver glycogen phosphorylase	PYGL	P06737
P6	N1,N10-(E)-N5-(Z)-tri-p-coumaroylspermidine	Matrix metalloproteinase 2	MMP2	P08253
P6	N1,N10-(E)-N5-(Z)-tri-p-coumaroylspermidine	Butyrylcholinesterase	BCHE	P06276
P6	N1,N10-(E)-N5-(Z)-tri-p-coumaroylspermidine	Dopamine D2 receptor	DRD2	P14416
P6	N1,N10-(E)-N5-(Z)-tri-p-coumaroylspermidine	Tyrosine-protein kinase JAK2	JAK2	O60674
P6	N1,N10-(E)-N5-(Z)-tri-p-coumaroylspermidine	Dopamine D3 receptor	DRD3	P35462
P6	N1,N10-(E)-N5-(Z)-tri-p-coumaroylspermidine	Vascular endothelial growth factor receptor 2	KDR	P35968
P6	N1,N10-(E)-N5-(Z)-tri-p-coumaroylspermidine	Calpain 1	CAPN1	P07384
P6	N1,N10-(E)-N5-(Z)-tri-p-coumaroylspermidine	Dual specificity phosphatase Cdc25B	CDC25B	P30305
P6	N1,N10-(E)-N5-(Z)-tri-p-coumaroylspermidine	C-C chemokine receptor type 2	CCR2	P41597
P6	N1,N10-(E)-N5-(Z)-tri-p-coumaroylspermidine	Cytosolic phospholipase A2	PLA2G4A	P47712
P6	N1,N10-(E)-N5-(Z)-tri-p-coumaroylspermidine	Bromodomain-containing protein 4	BRD4	O60885
P6	N1,N10-(E)-N5-(Z)-tri-p-coumaroylspermidine	P2X purinoceptor 7	P2RX7	Q99572
P7	N1,N5,N10-tri-p-coumaroylspermidine	Dynamin-1	DNM1	Q05193
P7	N1,N5,N10-tri-p-coumaroylspermidine	Epidermal growth factor receptor erbB1	EGFR	P00533
P7	N1,N5,N10-tri-p-coumaroylspermidine	Sigma opioid receptor	SIGMAR1	Q99720
P7	N1,N5,N10-tri-p-coumaroylspermidine	Matrix metalloproteinase 1	MMP1	P03956
P7	N1,N5,N10-tri-p-coumaroylspermidine	Histone acetyltransferase p300	EP300	Q09472
P7	N1,N5,N10-tri-p-coumaroylspermidine	Butyrylcholinesterase	BCHE	P06276
P7	N1,N5,N10-tri-p-coumaroylspermidine	Acetylcholinesterase	ACHE	P22303
P7	N1,N5,N10-tri-p-coumaroylspermidine	Liver glycogen phosphorylase	PYGL	P06737
P7	N1,N5,N10-tri-p-coumaroylspermidine	Dopamine D2 receptor	DRD2	P14416
P7	N1,N5,N10-tri-p-coumaroylspermidine	Matrix metalloproteinase 9	MMP9	P14780
P7	N1,N5,N10-tri-p-coumaroylspermidine	Matrix metalloproteinase 2	MMP2	P08253
P7	N1,N5,N10-tri-p-coumaroylspermidine	C-C chemokine receptor type 2	CCR2	P41597
P8	N5,N10-dicoumaroyl- N1,N14-dicaffeoylspermidine	Dynamin-1	DNM1	Q05193
P8	N5,N10-dicoumaroyl- N1,N14-dicaffeoylspermidine	Acetylcholinesterase	ACHE	P22303
P8	N5,N10-dicoumaroyl- N1,N14-dicaffeoylspermidine	Epidermal growth factor receptor erbB1	EGFR	P00533
P8	N5,N10-dicoumaroyl- N1,N14-dicaffeoylspermidine	Matrix metalloproteinase 9	MMP9	P14780
P8	N5,N10-dicoumaroyl- N1,N14-dicaffeoylspermidine	Matrix metalloproteinase 1	MMP1	P03956
P8	N5,N10-dicoumaroyl- N1,N14-dicaffeoylspermidine	Matrix metalloproteinase 2	MMP2	P08253
P8	N5,N10-dicoumaroyl- N1,N14-dicaffeoylspermidine	Butyrylcholinesterase	BCHE	P06276
P8	N5,N10-dicoumaroyl- N1,N14-dicaffeoylspermidine	Histone acetyltransferase p300	EP300	Q09472
P8	N5,N10-dicoumaroyl- N1,N14-dicaffeoylspermidine	Sigma opioid receptor	SIGMAR1	Q99720
P8	N5,N10-dicoumaroyl- N1,N14-dicaffeoylspermidine	Liver glycogen phosphorylase	PYGL	P06737
P8	N5,N10-dicoumaroyl- N1,N14-dicaffeoylspermidine	Methionine aminopeptidase 2	METAP2	P50579
P8	N5,N10-dicoumaroyl- N1,N14-dicaffeoylspermidine	C-C chemokine receptor type 2	CCR2	P41597
P8	N5,N10-dicoumaroyl- N1,N14-dicaffeoylspermidine	Cyclooxygenase-2 (by homology)	PTGS2	P35354
P9	N10-caffeoyl-N1,N5-di-p-coumaroylspermidine	Epidermal growth factor receptor erbB1	EGFR	P00533
P9	N10-caffeoyl-N1,N5-di-p-coumaroylspermidine	Dynamin-1	DNM1	Q05193
P9	N10-caffeoyl-N1,N5-di-p-coumaroylspermidine	Acetylcholinesterase	ACHE	P22303
P9	N10-caffeoyl-N1,N5-di-p-coumaroylspermidine	Histone acetyltransferase p300	EP300	Q09472
P9	N10-caffeoyl-N1,N5-di-p-coumaroylspermidine	Monoamine oxidase B	MAOB	P27338
P9	N10-caffeoyl-N1,N5-di-p-coumaroylspermidine	Sigma opioid receptor	SIGMAR1	Q99720
P9	N10-caffeoyl-N1,N5-di-p-coumaroylspermidine	Dopamine D2 receptor	DRD2	P14416
P9	N10-caffeoyl-N1,N5-di-p-coumaroylspermidine	Liver glycogen phosphorylase	PYGL	P06737
P9	N10-caffeoyl-N1,N5-di-p-coumaroylspermidine	Butyrylcholinesterase	BCHE	P06276
P9	N10-caffeoyl-N1,N5-di-p-coumaroylspermidine	Matrix metalloproteinase 2	MMP2	P08253
P9	N10-caffeoyl-N1,N5-di-p-coumaroylspermidine	Matrix metalloproteinase 9	MMP9	P14780
P9	N10-caffeoyl-N1,N5-di-p-coumaroylspermidine	Matrix metalloproteinase 1	MMP1	P03956
P9	N10-caffeoyl-N1,N5-di-p-coumaroylspermidine	Methionine aminopeptidase 2	METAP2	P50579
P9	N10-caffeoyl-N1,N5-di-p-coumaroylspermidine	Dopamine D3 receptor	DRD3	P35462
P9	N10-caffeoyl-N1,N5-di-p-coumaroylspermidine	C-C chemokine receptor type 2	CCR2	P41597
P9	N10-caffeoyl-N1,N5-di-p-coumaroylspermidine	Cyclooxygenase-2 (by homology)	PTGS2	P35354

## Sheet: Sheet2
CDA
ADA
PYGM
TK1
TYMS
ADORA1
TK2
P2RY6
OGT
HEXA
HEXB
OGA
CA2
CA12
CA9
P2RY4
P2RY2
FUCA1
ADORA2A
CA1
GGH
ADK
PYGL
PYGB
DPP4
PTPN1
PTPN2
POLA1
GBA
KDM4E
ADORA3
TYMP
HPRT1
GAA
ST6GAL1
IMPDH1
IMPDH2
ADH1A
MMP3
MMP9
MMP1
ADAM17
IARS
TRPM2
DUT
NAALAD2
SLC5A1
MMP13
MMP7
MMP12
MMP8
ADORA2B
SLC5A2
SLC5A4
TOP1
TYR
HRAS
PRKCA
SLC29A1
CA14
EIF4E
CDC42
RAC1
CD38
TERT
RNASE2
RNASE1
RARS
FBP1
POLB
QARS
RNASEL
DTYMK
MAPKAPK2
HSPA1A
P2RY1
P2RY11
DNPH1
HLCS
P2RX1
PARG
SRC
FHIT
ADCY10
P2RY12
HSPA5
ENPP1
HSPA8
ASNS
AKT1
CHAT
EHMT1
EHMT2
AMD1
BCHE
SETD7
EP300
AHCY
MARS
SRM
UMPS
B4GALT1
P2RY14
POLG
FDPS
GAPDH
ATIC
SETD2
CARM1
PRMT1
MCL1
EGFR
PDCD4
MTAP
LDHB
SELP
FABP3
GPR34
P2RY10
GPR174
PTAFR
ENPP2
GPR55
LPAR6
LPAR3
LPAR2
LPAR1
TRPV1
LPAR5
LPAR4
RPS6KA3
CA4
NQO2
NOX4
ACHE
AKR1B1
CA7
ADRA2C
NMUR2
ADRA2A
PDE5A
PTGS2
XDH
TNF
IL2
ALOX5
CYP1B1
ABCC1
ABCG2
ALOX15
ALOX12
IGF1R
AVPR2
MAOA
FLT3
CYP19A1
F2
PIM1
AURKB
DRD4
GLO1
MPO
PIK3R1
DAPK1
GSK3B
PTK2
HSD17B2
KDR
CA3
PLK1
CA6
CDK1
MMP2
PKN1
CSNK2A1
MET
NEK2
CXCR1
CAMK2B
ALK
ABCB1
NEK6
PLA2G1B
CA5A
BACE1
AXL
NUAK1
AKR1C2
AKR1C1
AKR1C3
AKR1C4
CA13
AKR1A1
GPR35
MAPT
TOP2A
INSR
MYLK
SYK
PIK3CG
APEX1
CDK5R1 CDK5
CCNB3 CDK1 CCNB1 CCNB2
CDK6
CDK2
ARG1
APP
HSD17B1
AHR
ESRRA
PTPRS
PLG
ESR2
MPG
SLC22A12
PARP1
TTR
AKR1B10
TNKS2
F10
ALDH2
TNKS
ESR1
CFTR
PFKFB3
AMY1A
GRK6
SHBG
CBR1
PTGS1
MAOB
TAS2R31
GRM5
CES1
PPARG
CES2
PLA2G2A
PLA2G5
PLA2G10
CHRNA7
KLK1
KLK2
RXRA
SERPINE1
HSD17B14
KIT
FGFR1
CA5B
CTSB
CLK1
DYRK1B
ESRRB
DYRK1A
IGFBP3
YWHAG
SIRT2
F3
PTGER1
PTGER2
PTGER3
BCL2L1
PIK3CB
CYP2C9
CYP3A4
PIK3CA
VCP
PGF
VEGFA
EDNRA
ERN1
BCL2
WEE1
LCK
CCNE1 CDK2
CCNE1 CDK3
CDK4
AURKA
SNCA
HNF4A
DNM1
SIGMAR1
CAPN1
CCR2
DRD2
DRD3
METAP2
NPY1R
BRAF
MDM4
MDM2
PDK1
ITK
MMP14
BMP1
TAOK1
PTK2B
ROCK2
ROCK1
NPY5R
CPT1A
CFD
CCKAR
CCKBR
CHEK1
CDC25B
NCOR2 HDAC3
KIF11
JAK2
CTSL
PSMB2
PSMB5
OXTR
HSP90AB1
TACR3
NTRK1
EGLN2
EGLN1
EGLN3
GRPR
OPRM1
PLA2G4A
BRD4
P2RX7
ABL1
LYN
FGFR2
SLC6A5

## Sheet: Sheet3
P1	N1,N10-bis(p-coumaroyl)spermidine
P2	N5,N14-dicoumaroyl- N1-caffeoylspermidine
P3	N10,N14-dicoumaroyl- N1-caffeoylspermidine
P4	N1,N5,N10-(Z)-tri-p-coumaroylspermidine
P5	N1,N5-(Z)-N10-(E)-tri-p-coumaroylspermidine
P6	N1,N10-(E)-N5-(Z)-tri-p-coumaroylspermidine
P7	N1,N5,N10-tri-p-coumaroylspermidine
P8	N5,N10-dicoumaroyl- N1,N14-dicaffeoylspermidine
P9	N10-caffeoyl-N1,N5-di-p-coumaroylspermidine
P10	N1-N5-N10-N14-(Z)-tetra-p-coumaroylspermine
P11	N1-N14-(Z)-N5-N10(E)-tetra-p-coumaroylspermine
P12	N1-N14-(E)-N5-N10(Z)-tetra-p-coumaroylspermine
P13	N1,N5,N10,N14-tetra-p-coumaroylspermine
P14	N1,N5,N10-(E)-tricaffeoylspermidine
P15	N,N'-di(coumaroyl)putrescine
F1	3,7-Di-O-glucosylkaempferol
F2	kaempferol-3-O-sophoroside
F3	isorhamnetin 3-O-β-D-xylopyranosyl (1→2)-β-D-glucopyranoside
F4	quercetin-3-O-D-glucoside-7-O-D-glucoside
F5	astragalin
F6	kaempferol 7-O-glucoside
F7	kaempferol 3-rhamnoside
F8	isoquercetin
F9	isorhamnetin 3,7-O-di-β-D-glucopyranoside
F10	isorhamnetin 3-O-sophoroside
F11	quercetin 3-O-β-D-glucopyranosyl-(2->1)-O-β-D-xylopyranoside
F12	kaempferol 3-O-(6’’-O-malonyl)glucoside
F13	isorhamnetin-3-O-rhamnoside
F14	isorhamnetin-3-O-glucoside
F15	kaempferol 3-O-α-L-arabinopyranosyl-(1'''->6'')-β-D-glucopyranoside
F16	3-O-[β-D-xylopyranosyl-(1->2)-β-D-glucopyranosyl]-kaempferol
F17	kaempferol-3-rutinoside
F18	isorhamnetin 3-O-neohesperidoside
F19	kaempferol 3-O-β-D-(2-O-β-D-6-O-acetylglucosyl)-glucopyranoside
F20	naringenin
F21	kaempferol
F22	isorhamnetin
Mis1	5'-Uridylic Acid
Mis2	sinigrin
Mis3	progoitrin
Mis4	gluconapin
Mis5	glucoraphanin
Mis6	uridine
Mis7	5'-adenosine monophosphate
Mis8	glucoalyssin
Mis9	cyclic guanosine 3',5'-monophosphate
Mis10	adenosine 3',5'-cyclic monophosphate
Mis11	gluconasturtiin
